# Supplementary material
Source: publisher figshare collection journal article supplement (https://gsapubs.figshare.com/ndownloader/files/27492173)
Supplement: Supplementary file 1 [file 27492173]

## SUPPLEMENTARY MATERIAL

### CONTENTS

#### 1. Supplementary Methods

|                                              |      |
|----------------------------------------------|------|
| 1.1. Synthesis of diffusion couples. . . . . | p. 2 |
| 1.2. Annealing experiments . . . . .         | p. 3 |
| 1.3. Cathodoluminescence imaging . . . . .   | p. 4 |
| 1.4. TEM mapping. . . . .                    | p. 5 |
| 1.5. HIM-SIMS mapping. . . . .               | p. 5 |
| 1.6. BSE imaging . . . . .                   | p. 6 |
| 1.7. LA-ICP-MS analysis . . . . .            | p. 6 |
| 1.8. Thermobarometry . . . . .               | p. 7 |
| 1.9. PACE . . . . .                          | p. 7 |

#### 2. Supplementary Figures

|                                                               |       |
|---------------------------------------------------------------|-------|
| Suppl. Fig. S2 (CL image of Ti-rich starting material SM02) . | p. 8  |
| Suppl. Fig. S3 (CL image of Ti-poor starting material SM03)   | p. 8  |
| Suppl. Fig. S4 (CL profile of run TiDi16 vs. SM02) . . . . .  | p. 9  |
| Suppl. Fig. S5 (CL profile of run TiDi01) . . . . .           | p. 10 |
| Suppl. Fig. S6 (inverse CL profiles) . . . . .                | p. 11 |
| Suppl. Fig. S7 (luminescence low) . . . . .                   | p. 12 |
| Suppl. Fig. S8 (CL inversion in natural sample) . . . . .     | p. 13 |
| Suppl. Fig. S9 (additional TEM profiles) . . . . .            | p. 13 |
| Suppl. Fig. S10 (rutile exsolution in run TiDi17) . . . . .   | p. 14 |
| Suppl. Fig. S11 (Shaggy Peak sanidine F2) . . . . .           | p. 15 |
| Suppl. Fig. S12 (Shaggy Peak sanidine F3) . . . . .           | p. 16 |
| Suppl. Fig. S13 (Shaggy Peak quartz Q3) . . . . .             | p. 17 |
| Suppl. Fig. S14 (Shaggy Peak quartz Q5) . . . . .             | p. 18 |

#### 3. Tables

|                                                                    |       |
|--------------------------------------------------------------------|-------|
| Suppl. Table S1 (overview of Ti diffusion experiments) . . . . .   | p. 19 |
| Suppl. Table S2 (diffusion data of Shaggy Peak Rhyolite) . . . . . | p. 19 |
| Suppl. Table S3 (TitaniQ and MI data Shaggy Peak Rhyolite) .       | p. 20 |

#### 4. Supplementary References . . . . . p. 20

## 1. Supplementary Methods

### 1.1. Synthesis of diffusion couples

Diffusion couples were synthesized by hydrothermally growing rutile-saturated quartz over essentially Ti-free ( $<0.1 \mu\text{g/g Ti}$ ), Al-bearing ( $\sim 100 \mu\text{g/g Al}$ ) synthetic quartz seeds. For this purpose, quartz bars measuring  $\sim 2 \times 3 \times 25 \text{ mm}$  were cut out of a large, synthetic quartz crystal in such a manner that the crystallographic c-axis is perpendicular to two of the long sides of the bars. The surface of all four long sides was then finely polished using  $\text{Al}_2\text{O}_3$  and SiC grinding papers and subsequently  $1 \mu\text{m}$  and  $1/4 \mu\text{m}$  diamond spray. The polished quartz bars were then loaded with crushed synthetic rutile ( $125\text{--}250 \mu\text{m}$  grain size) and distilled water into Pt capsules of  $4.0 \text{ mm O.D.}$ ,  $3.7 \text{ mm I.D.}$  and  $35 \text{ mm length}$ , such that the quartz bars were completely covered by the rutile grains and  $\text{H}_2\text{O}$ . In the two runs that were aimed to produce very Ti-rich overgrowths (SM01 and SM02), crushed  $\text{SiO}_2$  glass ( $160\text{--}500 \mu\text{m}$  grain size) was admixed to the rutile (Fig. S1a).

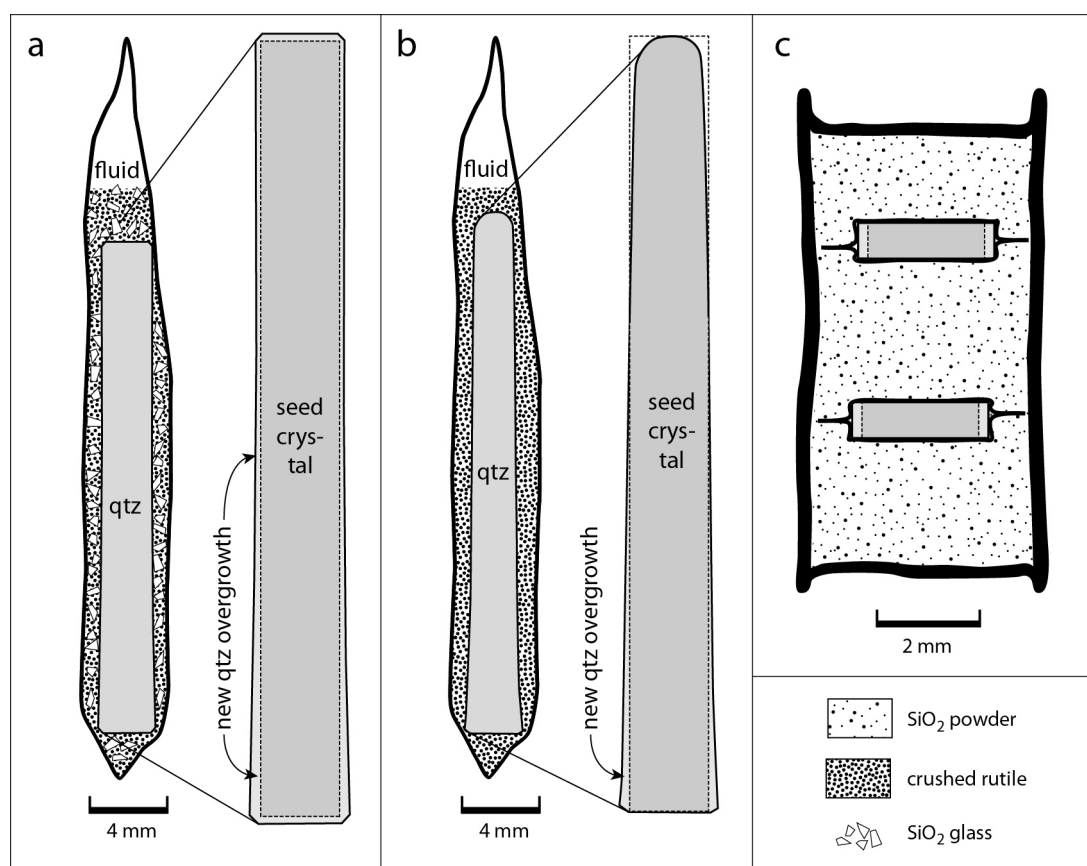

Figure S1: Schematic drawing of the utilized sample capsules.

These two capsules were run for 4-5 hours at  $1,000^\circ\text{C}$  and  $100 \text{ MPa}$  in an Ar-pressurized TZM vessel. To avoid any quartz precipitation and gradual increase in Ti concentrations during the heating of the autoclaves the capsules were kept at the cold end of the autoclave until the final temperature was reached, and then they were brought within seconds with the help of an external magnet to the hot end of the autoclave. During the experiments, part of the crushed  $\text{SiO}_2$  glass dissolved and re-precipitated on the  $\pm\text{Ti}$ -free seed bars, and also part of the rutile recrystallized, resulting in a new quartz overgrowth containing  $2,000\text{--}3,000 \mu\text{g/g Ti}$  and  $70\text{--}100 \mu\text{g/g Al}$ . These Ti concentrations are

distinctly higher than the equilibrium value (855  $\mu\text{g/g}$ ) predicted by the model of Huang and Audétat (2012) because the quartz grew relatively rapidly in the presence of  $\text{SiO}_2$  glass. Due to variations in growth rate the Ti and Al concentrations vary also within individual experiments. Part of the Ti in the Ti-rich starting material was thus hosted in crystal imperfections and may not have been able to diffuse properly if the annealing experiments were performed at the same P-T conditions. However, many annealing experiments were performed at 1 atm and 1,000-1,200  $^{\circ}\text{C}$ , at which conditions the predicted equilibrium Ti solubility is 2,800-5,600  $\mu\text{g/g}$ . This means that during these experiments all Ti should have been fully dissolved in the crystal structure and, hence, to have diffused regularly. The same is true for the annealing experiment performed at 1,400  $^{\circ}\text{C}$  / 300 MPa, at which conditions the predicted Ti solubility is 2,500  $\mu\text{g/g}$ , whereas in the experiments performed at 1,600  $^{\circ}\text{C}$  / 2 GPa the predicted solubility value (in this case poorly constrained) is 1,400  $\mu\text{g/g}$  and thus below the 2,000-3,000  $\mu\text{g/g}$  of the starting material. One capsule that did not contain any added  $\text{SiO}_2$  glass was run for 166 hrs at 700  $^{\circ}\text{C}$ , 200 MPa in a conventional rapid-quench cold-seal pressure vessel in which  $\text{H}_2\text{O}$  was used as pressure medium (run SM03). In this case the upper parts of the quartz bar dissolved and re-precipitated very slowly onto the slightly cooler, lower part of the bar (Fig. S1b), forming a new quartz overgrowth that contained  $\sim 100$   $\mu\text{g/g}$  Ti (close to the equilibrium value of 851  $\mu\text{g/g}$ ) and  $\sim 370$   $\mu\text{g/g}$  Al. The Al in the new overgrowth stems mainly from the re-crystallization of rutile, which contained  $\sim 800$   $\mu\text{g/g}$  Al as impurity. All runs were terminated by slow (within  $\sim 10$  seconds) in-situ quenching. The recovered quartz bars were then sectioned into 15-20 pieces perpendicular to the long axis of the bars using a low-speed diamond saw. The resulting slices were composed of a rectangular core of essentially Ti-free quartz, which on four sides are surrounded by Ti-enriched quartz (supplementary Figs. S2-S3). Both quartz generations extinguished fully and simultaneously under crossed nicols in the petrographic microscope, suggesting undisturbed epitaxial growth. Furthermore, CL, TEM and HIM-SIMS maps of these starting materials revealed perfect step functions of the Ti concentrations at the core-rim contacts within the spatial resolution of each technique ( $\sim 0.2$   $\mu\text{m}$  in CL;  $\sim 0.07$   $\mu\text{m}$  in HIM-SIMS;  $\sim 0.04$   $\mu\text{m}$  in TEM-EDXS; see below).

### *1.2. Annealing experiments*

Individual slices of the synthesized diffusion couples were annealed either in 1 atm gas mixing furnaces or at 0.3-2.0 GPa in piston cylinder presses. Experiments at 1 atm were successful only at  $\leq 1,300$   $^{\circ}\text{C}$  because at higher temperatures the quartz transformed to tridymite within less than three days. In contrast, high-pressure experiments performed with the Ti-rich starting material were successful only at  $\geq 1,400$   $^{\circ}\text{C}$  because at lower temperatures the quartz became Ti-oversaturated and exsolved rutile crystals. The high-pressure experiments performed with the Ti-poor starting material were not affected by this problem. The experiments in the gas mixing furnaces lasted for 3-85 days and were conducted in air. The temperature in these furnaces was measured by type S ( $\text{Pt}_{100}/\text{Pt}_{90}\text{Rh}_{10}$ ) thermocouples and should be accurate within 5-10  $^{\circ}\text{C}$ . For the piston cylinder experiments slices of the diffusion couples were welded into 0.1 mm Pt foils and then filled with  $\text{SiO}_2$  powder into PtRh capsules of 5.0 mm O.D., 4.3 mm I.D. and 10 mm length, which subsequently were welded shut (Fig. S1c). The experiments were conducted in end-loaded piston cylinder presses using mostly 1/2" talc-pyrex-crushable  $\text{Al}_2\text{O}_3$

assemblies with a tapered graphite furnace. Temperature in these runs was measured by type D ( $\text{W}_{97}\text{Re}_{03}/\text{W}_{75}\text{Re}_{25}$ ) thermocouples and is known to only about  $\pm 50$  °C due to temperature gradients arising from irregular deformation of the graphite furnace during pressurization. A friction correction of 20% was applied based on calibrations of the quartz-coesite transition and the albite to jadeite+quartz transition. For one experiment a MgO-NaCl assembly with stepped graphite heater was used. The uncertainty in temperature in this assembly is about  $\pm 30$  °C and the friction correction is much lower (ca. 100 MPa, independent of the P-T conditions). The piston cylinder experiments were conducted at 0.3-2.0 GPa, 1,100-1,600 °C and durations of 2-34 days. The runs were terminated by lowering the temperature within ca. 1 minute and lowering the pressure within ca. 30 minutes. The recovered quartz slices were embedded with the surrounding Pt-foils in epoxy and then polished about 1/3 down to remove any diffusion profiles on their surface. The samples were then polished with 1/4  $\mu\text{m}$  diamond on Al foil to ensure a flat sample surface. An overview of the conducted experiments is given in supplementary Table S1.

### *1.3. Cathodoluminescence imaging*

The sample mounts were coated with 12-13 nm carbon prior to imaging. Polychromatic cathodoluminescence (CL) images were produced with a Zeiss Gemini 1530 field emission gun (FEG) scanning electron microscope equipped with an ellipsoidal mirror and a photomultiplier detector that detects all light in the visible range. The images were taken at a resolution of  $1024 \times 768$  pixels and a scan rate of 5-10 min/image, often scanning only a small part of the image (i.e., the immediate vicinity of the contact between low-Ti and high-Ti quartz) in order to save time. To achieve a high spatial resolution a low acceleration voltage was used (see e.g., the discussion in Gualda and Sutton, 2016). However, with decreasing voltage also the sensitivity decreases. In our instrument the optimal compromise between high spatial resolution and sufficient sensitivity was found at 7 kV and using an aperture of 120, which corresponds to ca. 5 nA sample current. The working distance was kept at around 14 mm. In the Ti-rich diffusion couples (2,000-3,000  $\mu\text{g/g}$  Ti in the new quartz overgrowth) the image contrast was set such that either the low-luminescent side was not totally black or the high-luminescent side was not totally white; in the Ti-poor diffusion couples ( $\sim 100$   $\mu\text{g/g}$  Ti) and in the natural quartz samples the contrast was set such that neither side was totally black or totally white. Using these settings a spatial resolution corresponding to a full width at half maximum (FWHM) of 0.18-0.19  $\mu\text{m}$  was achieved in slow scans of highly magnified core-rim contacts and healed cracks in the Ti-rich starting material, and a FWHM of 0.42  $\mu\text{m}$  in fast scans of the less Ti-rich starting material at slightly lower magnification. The synthetic Ti-rich diffusion couples and the magmatic quartz phenocryst from the Bandelier Tuff displayed consistently higher luminescence in the Ti-rich overgrowth than in the Ti-poor core, independent of magnification and scan speed (supplementary Figs. S4-S5). In contrast, the synthetic Ti-poor diffusion couples showed an unusual CL behavior at high magnifications: whereas at fast scan rates ( $\sim 2$  s/image) the luminescence intensity was higher on the Ti- and Al-rich side than on the Ti- and Al-poor side (as usual), the profiles inverted at slow scan rates (5-10 min/image) at high magnifications (supplementary Fig. S6). Furthermore, in some of these samples a pronounced luminescence low developed at the boundary between Ti-poor and Ti-rich quartz,

resulting in grayscale profiles that do not resemble diffusion profiles (supplementary Fig. S7). The same effects were observed in a natural, low-temperature hydrothermal quartz sample (supplementary Fig. S8). Götze (2009) reports that in hydrothermally-grown quartz crystals (both natural and synthetic ones) the CL emission at 390 nm wavelength decreases rapidly during electron bombardment, and that this luminescence centre is related to Al. It is thus possible that some of the luminescence profiles observed in our synthetic, Ti-poor diffusion couples do not mirror the Ti distribution, but rather the distribution of Al or some other luminescence centres. If so, then the latter applies more likely for the inverted profiles because in natural, high-temperature ( $> 400\text{ }^{\circ}\text{C}$ ) quartz crystals examined at relatively low magnification the luminescence intensity generally correlates with Ti concentration (Rusk, 2012). Independent of which elements or defects caused the luminescence in these samples, if both the normal profiles obtained during fast scanning and the inverted profiles obtained during slow scanning are not longer than e.g.,  $1.0\text{ }\mu\text{m}$ , then none of the luminescence-producing elements should have diffused over longer distance. For this reason we always quantified the longer diffusion profile obtained at fast scanning rates (e.g., supplementary Fig. S6), and the diffusion coefficients derived from these synthetic low-Ti diffusion couples should thus represent maxima.

#### *1.4. TEM mapping*

Thin foils measuring ca.  $20\times 10\times 2\text{ }\mu\text{m}$  were cut out across the diffusion couple interfaces with the help of a focused ion beam instrument (FIB; FEI Scios DualBeam) using a  $\text{Ga}^+$  ion beam at 30 kV and 5-20 nA. The foils were subsequently thinned to a thickness of 100-200 nm using a low current of 100-300 pA. Before loading the foils into the TEM instrument they were plasma-cleaned in order to remove surface hydrocarbon contamination. Energy-dispersive X-ray spectroscopy (EDXS) maps of the samples were performed with a field emission scanning transmission electron microscope (FEI, Titan G2 80-200 S/TEM) equipped with an energy-dispersive X-ray spectrometer system (4 silicon drift detectors, Bruker Quantax). The maps were taken at a resolution of 4-10 nm per pixel and a dwell time of 16  $\mu\text{s}$  using a sub-nanometer-sized electron beam with less than 0.07 nA probe current at 200 kV acceleration voltage. To accumulate statistically enough Ti counts in the quantitative EDXS maps, the total acquisition time was 30 to 120 minutes. During signal acquisition, an image drift correction function was activated to prevent artificial broadening of the diffusion profiles.

In addition to the EDXS maps, high-angle annular dark-field (HDAAD), bright-field (BF), annular bright-field (ABF) and dark-field (DF) images were acquired to determine the lattice orientation of the quartz and to check for defect structures and the presence of  $\text{TiO}_2$  inclusions. In all cases the new Ti-bearing quartz grew perfectly epitaxially onto the Ti-free substrate without the formation of abundant defects at the contact, and the quartz was free of  $\text{TiO}_2$  inclusions except in the high-pressure runs performed with the Ti-rich starting material at  $<1400\text{ }^{\circ}\text{C}$ , which exsolved small, stubby to needle-shaped rutile crystals (supplementary Fig. S10) because the Ti-solubility in the quartz was exceeded.

#### *1.5. HIM-SIMS mapping*

A helium ion microscope (HIM) coupled with a secondary ion mass spectrometer (SIMS) (Wirtz et al., 2016; Dowsett and Wirtz, 2017) was used to evaluate the distribution of Ti in two Ti-rich starting materials and in one Ti-rich sample after annealing. The HIM

exhibits substantially higher resolution ( $\sim 0.3$  nm with a  $\text{He}^+$  ion beam;  $\sim 2$  nm with a  $\text{Ne}^+$  ion beam) and surface sensitivity than modern Scanning Electron Microscopes (SEM) or Focused Ion Beam (FIB) systems. To provide analytic information, a mass spectrometer was specifically designed and developed at LIST for the HIM Orion Nanofab microscope (Zeiss, Peabody, USA). In principle, this setup is capable of producing elemental SIMS maps with a lateral resolution about 20 nm (Dowsett and Wirtz, 2017; Kim et al., 2019). In this study, the HIM-SIMS system was optimized for the collection of the secondary ions generated by a Neon primary ion bombardment ( $\text{Ne}^+$ , 20 keV, 3 pA), which were transmitted to the high-performance double focusing magnetic sector mass spectrometer and finally detected in a multi-collector system (4 Channel Electron Multipliers) (Usiobo et al., 2020). For the analysis of the quartz samples, the instrument was tuned for the detection of titanium ( $^{48}\text{Ti}$ ,  $m = 47.9479$  amu) and silicon ( $^{28}\text{Si}$ ,  $m = 27.9769$  amu) isotopes in a matrix of 512x512 pixels with a counting time of 5 ms/pixel.

### 1.6. BSE imaging

In sanidine crystals with relatively high Ba concentrations and more or less constant orthoclase component the backscattered electron (BSE) intensity is a function of Ba content (Ginibre et al., 2014). The BSE images were acquired on a JEOL JXA-8200 microprobe using 15 kV, 20 nA, a focused beam, a scan rate of 31 seconds per image and an image resolution of 1280x1024 pixels. In some sanidine phenocrysts a narrow zone of intermediate gray shade was observed at the contact between Ba-poor core and Ba-rich overgrowth, suggesting a real growth zonation (i.e., an imperfect step function) prior to annealing. For this reason only the shortest Ba diffusion profiles were considered as representative.

### 1.7. LA-ICP-MS analysis

LA-ICP-MS analyses of quartz, sanidine and melt inclusions were performed using a 193 nm ArF Laser (GeolasPro; Coherent, USA) attached to a quadrupole ICP-MS (Elan DRC-e; Perkin Elmer, Canada). Diffusion profiles in sanidine were measured using a rectangular laser beam of  $\sim 5 \times 50$   $\mu\text{m}$  size whose long axis was oriented parallel to the growth zoning. The laser fluence at the sample surface was about  $10 \text{ J/cm}^2$  and the laser repetition rate was 7 Hz. For the analysis of quartz and quartz-hosted melt inclusions round laser pits, a fluence of about  $15 \text{ J/cm}^2$  and a repetition rate of 10 Hz was used. All measurements were performed in a rhombic sample chamber with an internal volume of  $\sim 8 \text{ cm}^3$ , which was flushed with He at a rate of 0.4 l/min, to which 5 ml/min  $\text{H}_2$  was admixed on the way to the ICP-MS. The ICP-MS system was tuned to a ThO rate of 0.07-0.10% and a rate of doubly-charged Ca ions of 0.14-0.20% according to measurements on NIST SRM 610 glass. Analyzed isotopes comprise  $^7\text{Li}$ ,  $^{11}\text{B}$ ,  $^{23}\text{Na}$ ,  $^{25}\text{Mg}$ ,  $^{29}\text{Si}$ ,  $^{30}\text{Si}$ ,  $^{39}\text{K}$ ,  $^{43}\text{Ca}$ ,  $^{49}\text{Ti}$ ,  $^{55}\text{Mn}$ ,  $^{57}\text{Fe}$ ,  $^{85}\text{Rb}$ ,  $^{88}\text{Sr}$ ,  $^{89}\text{Y}$ ,  $^{90}\text{Zr}$ ,  $^{93}\text{Nb}$ ,  $^{98}\text{Mo}$ ,  $^{118}\text{Sn}$ ,  $^{133}\text{Cs}$ ,  $^{137}\text{Ba}$ ,  $^{140}\text{Ce}$ ,  $^{187}\text{W}$ ,  $^{208}\text{Pb}$ ,  $^{209}\text{Bi}$ ,  $^{232}\text{Th}$  and  $^{238}\text{U}$ , using dwell times of 10-40 ms per isotope. External standardization was primarily based on NIST SRM610, except for the major and minor elements in the melt inclusions, which were standardized based on a well-characterized natural obsidian glass. Internal standardization of the melt inclusions (which were all glassy) was based on the  $\text{Al}_2\text{O}_3$  content of a few large, exposed melt inclusions, which could be analyzed without co-ablation of quartz host. For quartz a  $\text{SiO}_2$  concentration of 100 wt% was used as internal standard, and for sanidine analyses the sum of all major and

minor elements was normalized to 100 wt%. An overview of the diffusion coefficients obtained from the Shaggy Peak Rhyolite is provided in supplementary Table S2.

### 1.8. Thermobarometry

The P-T formation conditions of the quartz phenocrysts of the Shaggy Peak Rhyolite were reconstructed using the approach described in Audétat (2003). In this approach, the composition of melt inclusions (specifically their content of Zr and all major plus minor elements including TiO<sub>2</sub>) is used to constrain temperature via zircon saturation thermometry (Watson and Harrison, 1983) plus the activity of TiO<sub>2</sub> based on the TiO<sub>2</sub> solubility model of Kularatne and Audétat (2014). The Ti content of the host quartz is then used in conjunction with the TiO<sub>2</sub> activity and zircon saturation temperatures to calculate the entrapment pressure based on the TitaniQ model of Huang and Audétat (2012). The presence of zircon inclusions in quartz and feldspar phenocrysts of the Shaggy Peak Rhyolite confirms that the magma was zircon saturated. The compositions of eight melt inclusion – quartz pairs and the corresponding P-T conditions are summarized in supplementary Table S3. The results suggest that the Ti-rich rims of the quartz phenocrysts formed after a magma mixing event that occurred at ~730 °C and 300-400 MPa pressure. If the pressure were calculated based on the TitaniQ model of Thomas et al. (2010) instead of the one of Huang and Audétat (2012) they would turn out at 1.0-1.1 GPa. The dark-luminescent, Ti-poor cores of the quartz phenocryst cores grew at ~690 °C from a melt that contained 4-30 µg/g Ba, 3-14 µg/g Sr, and 15-18 µg/g Cs, and the high-luminescent, Ti-rich rims grew at ~730 °C from a melt that contained 500-600 µg/g Ba, 80-90 µg/g Sr, and 4-6 µg/g Cs.

### 1.9. Determination of diffusion coefficients using PACE

All diffusion profiles that were extracted with the help of ImageJ from the maps showed relatively flat plateaus on both sides and thus were fitted in PACE with the equation:

$$C(x, t) = C_2 + (C_1 - C_2) \times \frac{1}{2} \times \operatorname{erfc} \left( \frac{x - X}{2\sqrt{Dt}} \right)$$

in which C (x,t) denotes the concentration at position x and time t, X the inflection point of the profile and D the diffusion coefficient (m<sup>2</sup>s<sup>-1</sup>).

Signal deconvolution was performed using the FWHM distance determined at the contact between Ti-poor and Ti-rich quartz in the starting materials using the corresponding analytical technique, and a Gaussian interaction volume was assumed in all cases. In the case of the natural quartz phenocryst the diffusion coefficient was calculated by subtracting the initial Dt value from the final one and then dividing through time.

## 2. Supplementary Figures

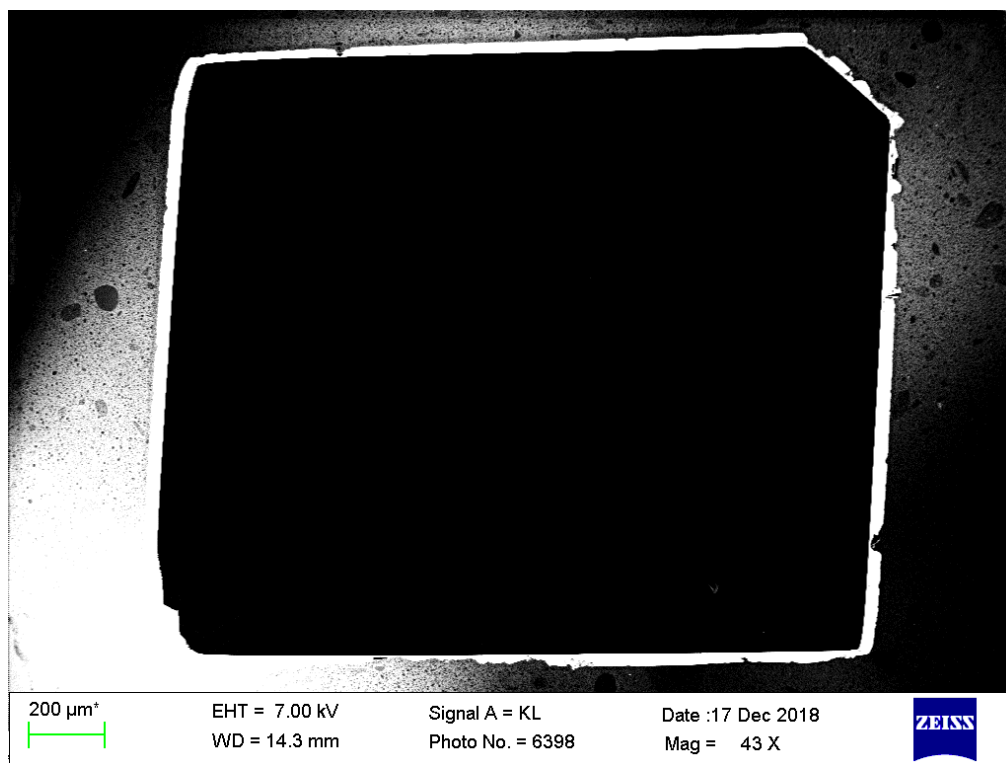

*Supplementary Figure S2.* Cathodoluminescence image of a slice of the Ti-rich diffusion couple starting material SM02, which features a black,  $\pm$ Ti-free quartz core over which a thin quartz layer containing 3,000  $\mu\text{g/g}$  Ti (showing up white in the image) was grown hydrothermally.

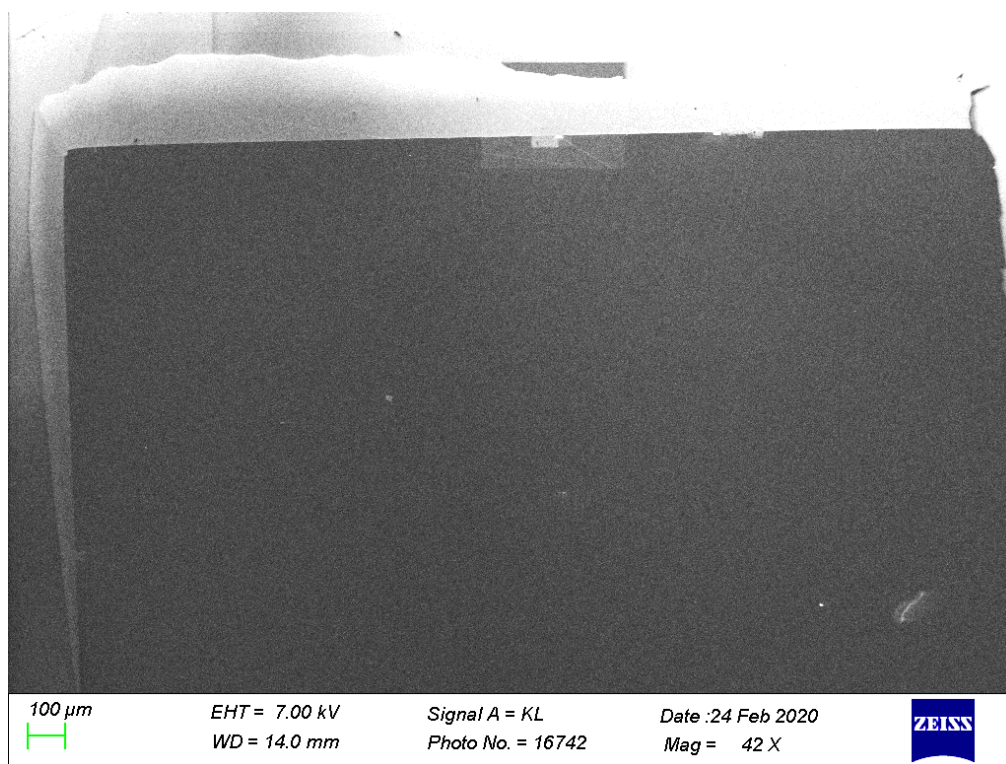

*Supplementary Figure S2.* CL image of a slice of the starting Ti-poor diffusion couple starting material SM03, which contains  $\sim 100$   $\mu\text{g/g}$  Ti in the new quartz overgrowth. The bright rectangles at the boundary between old and new quartz are electron beam damages from previous images taken at higher magnification.



SM02 (= starting material)

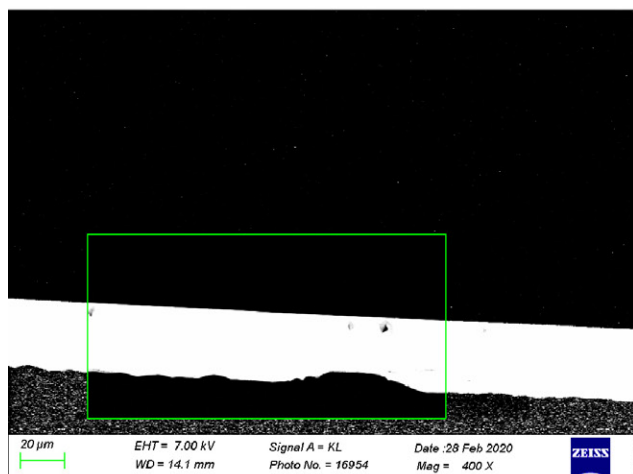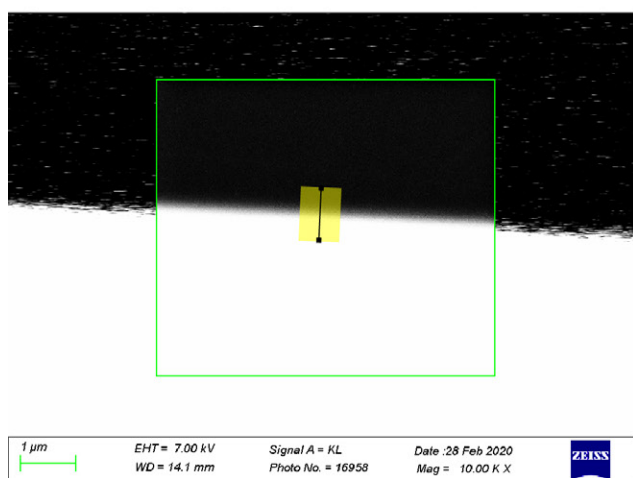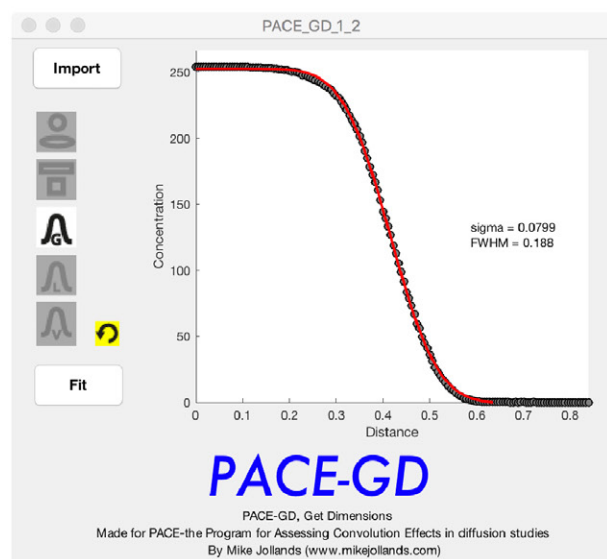

TiDi16 (= after annealing at 1600 °C  
2.0 GPa for 90 hrs)

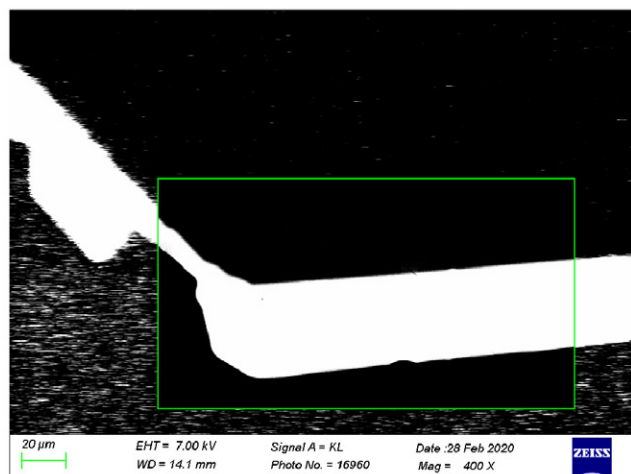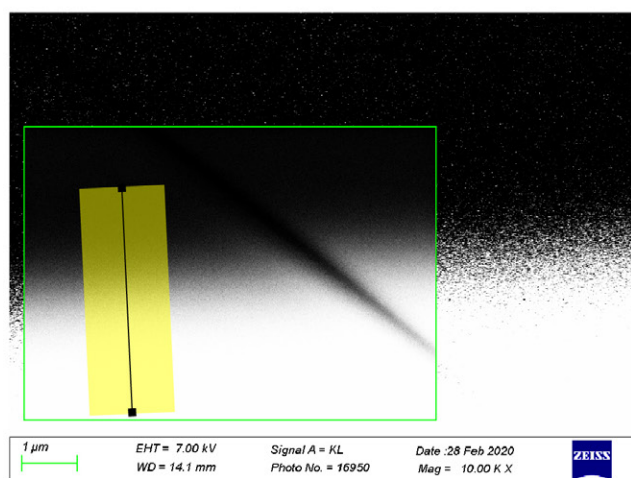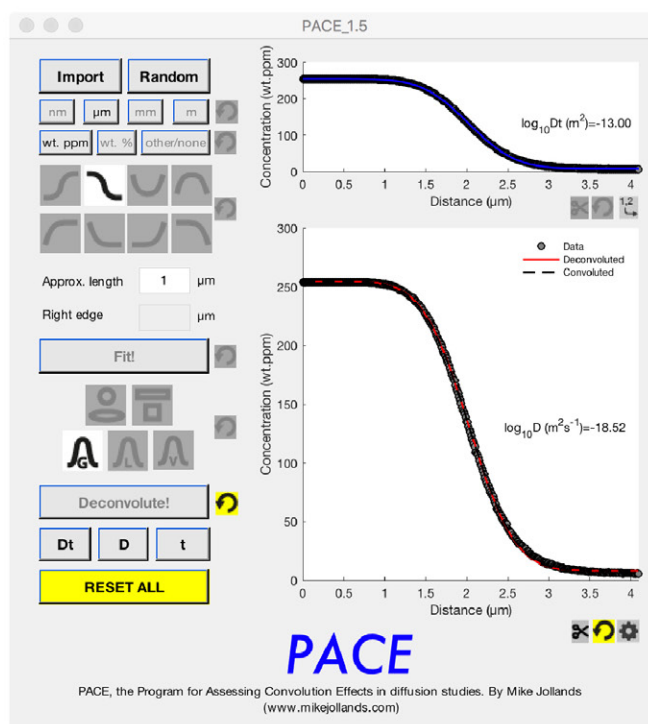

*Supplementary Figure S4.* CL images, ImageJ profiles (yellow, semitransparent areas) and PACE fits of a synthetic, Ti-rich diffusion couple before and after annealing at 1,600 °C and 2.0 GPa for 90 hours.

The untreated half of the quartz phenocryst:

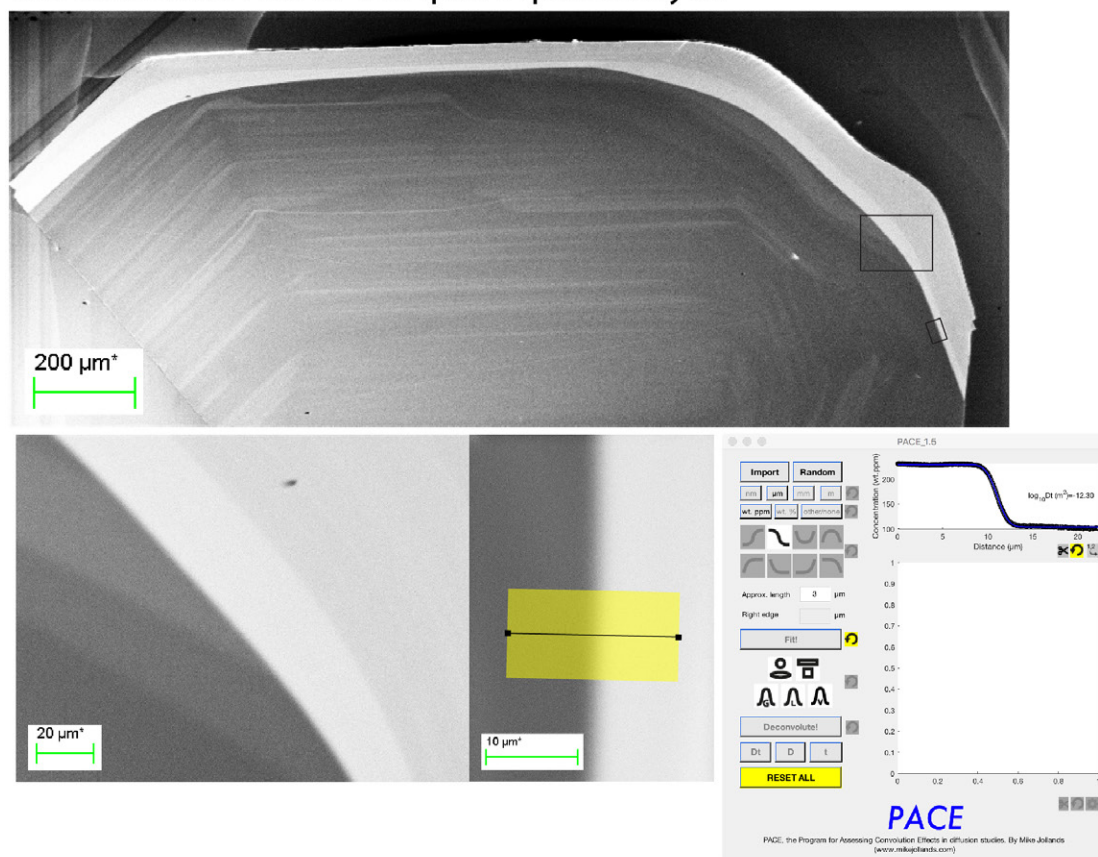

The other half of the same phenocryst after 75 hrs at 1600  $^{\circ}\text{C}$  / 2.0 GPa:

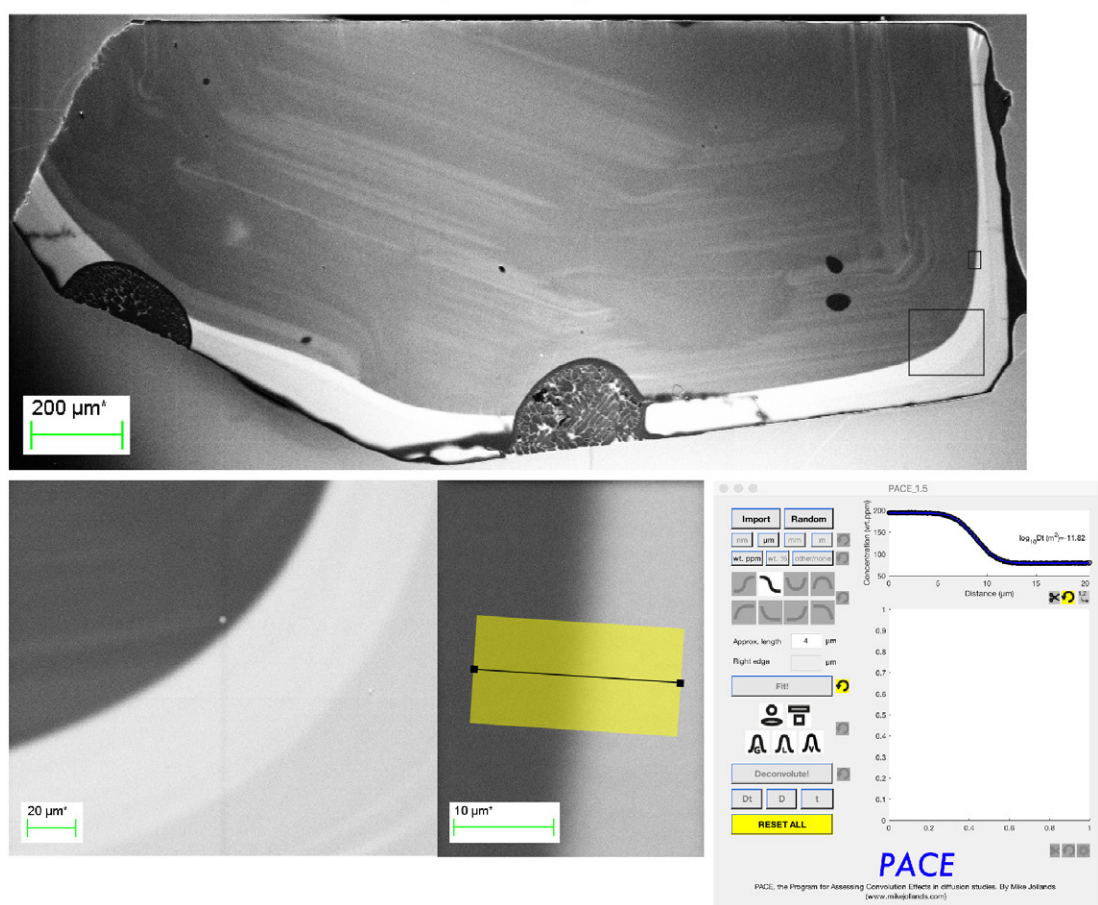

*Supplementary Figure S5.* CL images, ImageJ profiles (yellow areas) and PACE fits of two halves of the same quartz phenocryst from the Upper Bandelier Tuff, New Mexico, USA.



SM03 (= starting material)

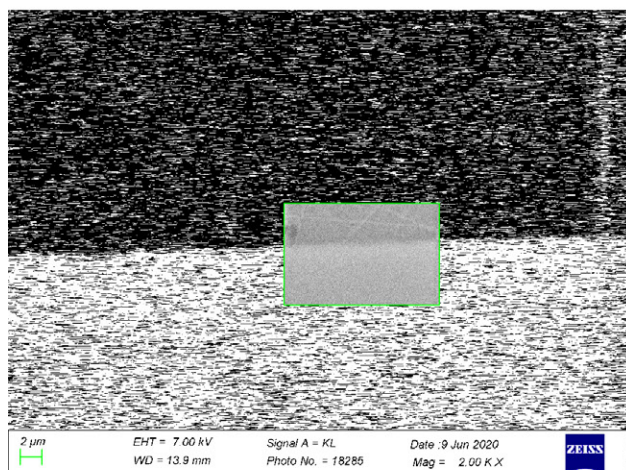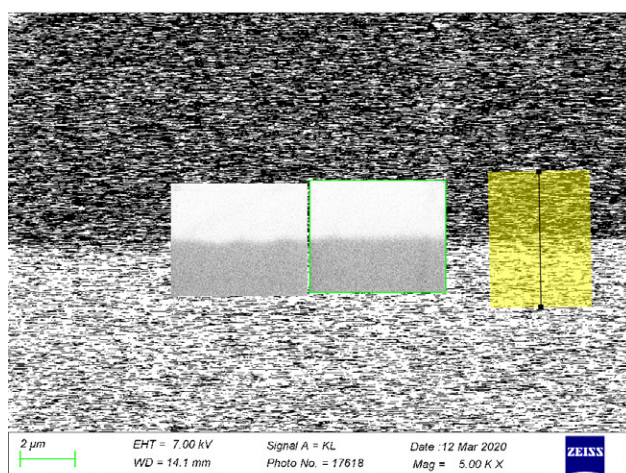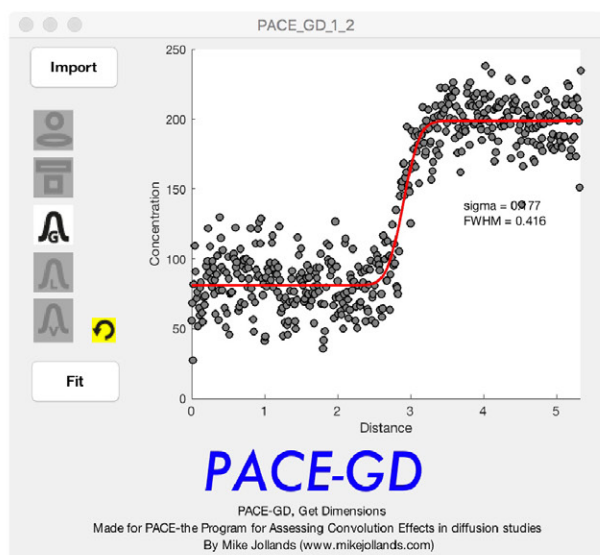

TiDi45 (= after annealing at 1200 °C  
1 tm for 473 hrs)

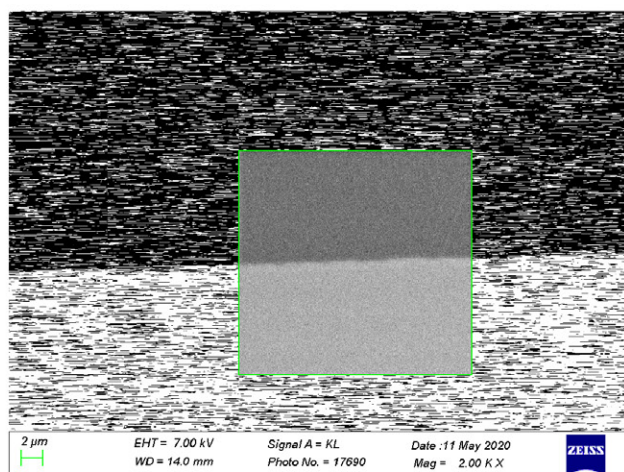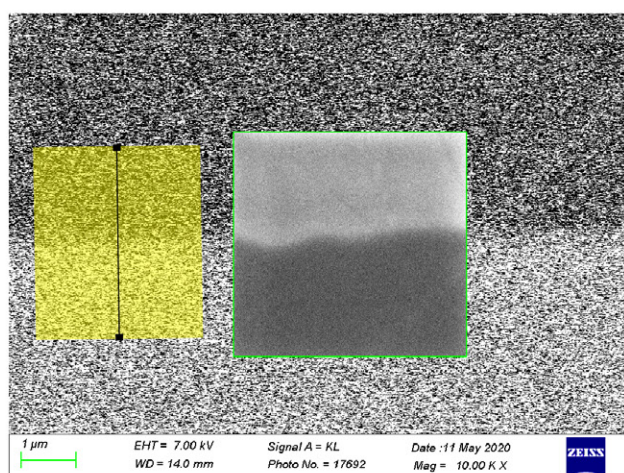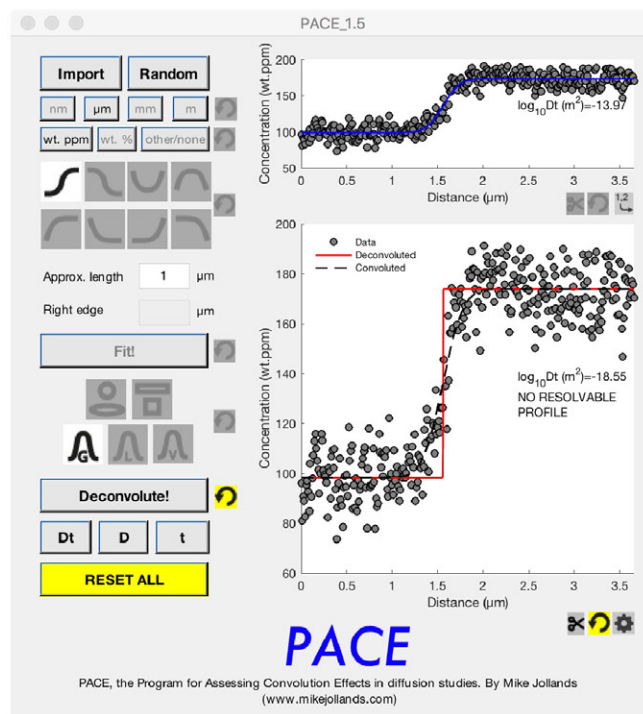

*Supplementary Figure S6.* CL images, ImageJ profiles (yellow areas) and PACE fits of a synthetic low-Ti diffusion couple before and after annealing at 1,200 °C and 1 atm. The coarse-grained parts of the images were scanned at fast rates (ca. 2 s / image), whereas the highly resolved insets were scanned at slow rates (ca. 2 minutes per inset). Notice the inverse CL distribution in the insets at very high magnification.



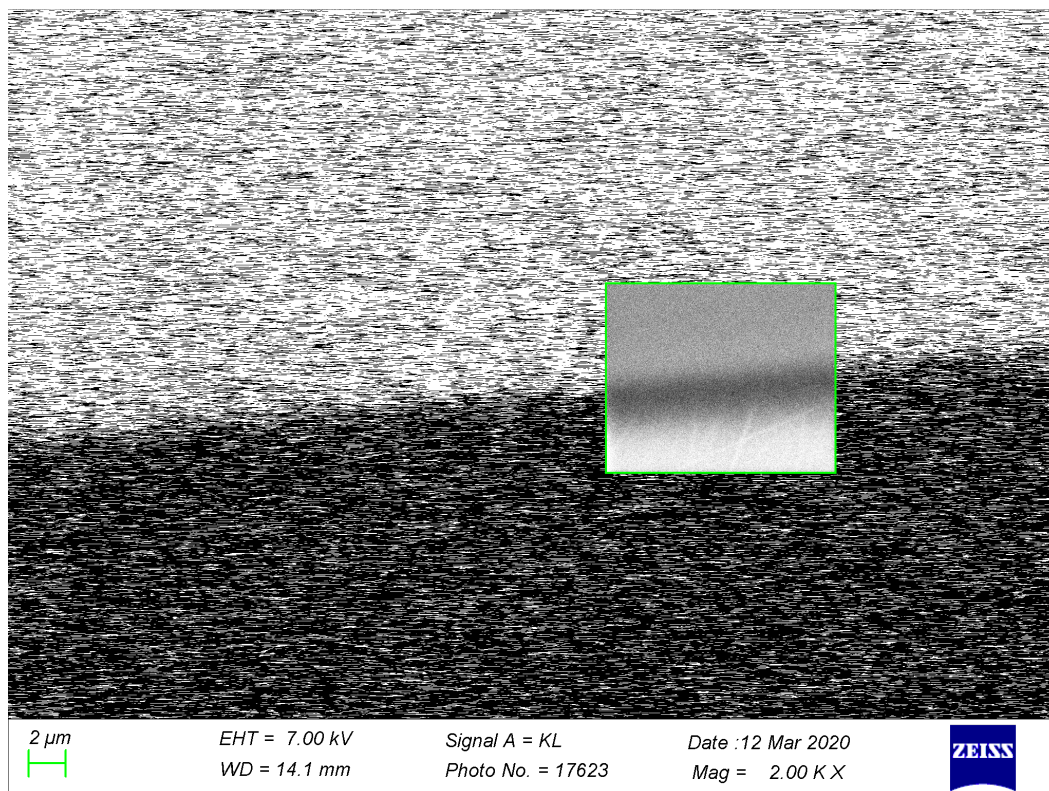

*Supplementary Figure S7.* Cathodoluminescence image of sample TiDi41, which showed the most pronounced luminescence low at the contact between Ti-bearing and Ti-poor quartz at slow scan rates.

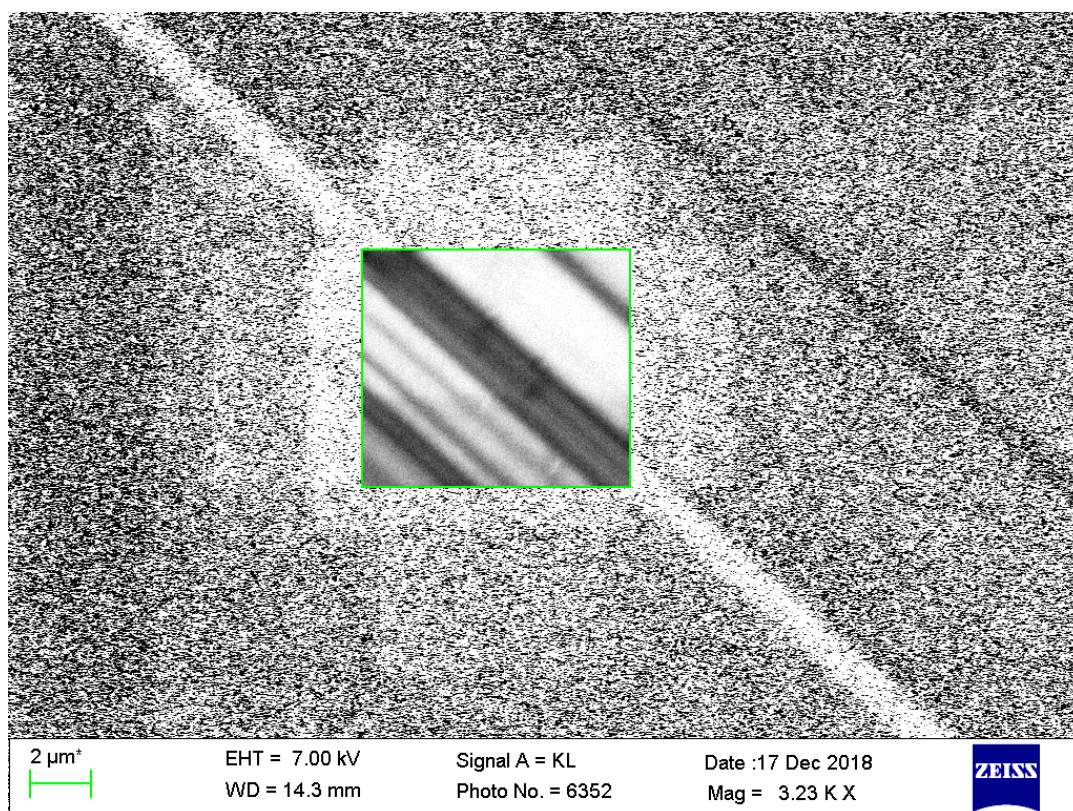

*Supplementary Figure S8.* Cathodoluminescence image of a natural, low-temperature (<400 °C) hydrothermal quartz from the Cañada Pinabete Pluton, New Mexico (USA). Similar to the synthetic low-Ti diffusion couple, the luminescence intensities got inversed during slow scanning at high magnifications and dark band developed at the contact between individual layers.



SM02 (= starting material)

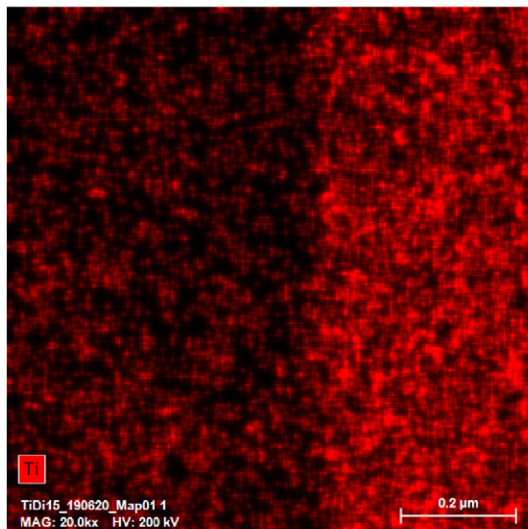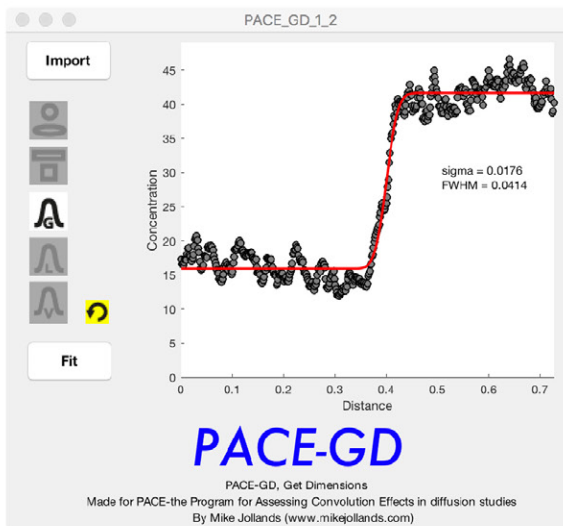

TiDi22 (= after annealing at 1000 °C, 2.0 GPa for 2033 hrs)

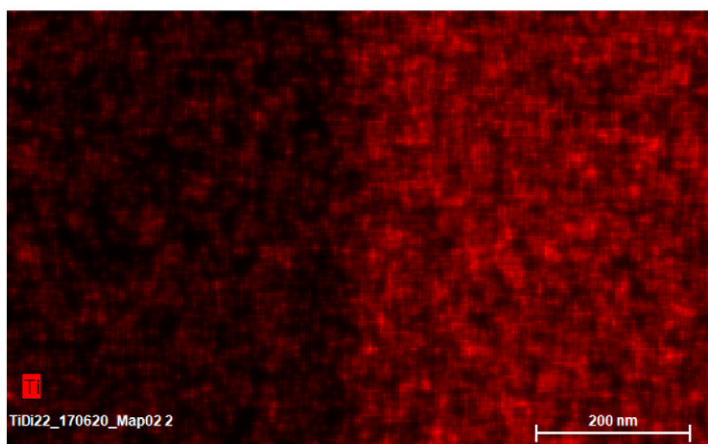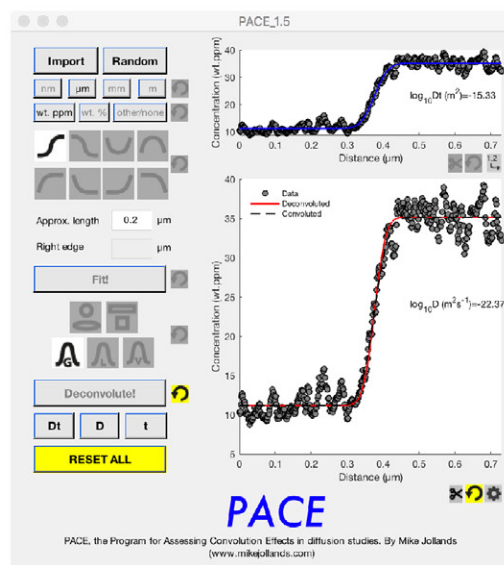

TiDi27 (= after annealing at 1400 °C, 0.3 GPa for 166 hrs)

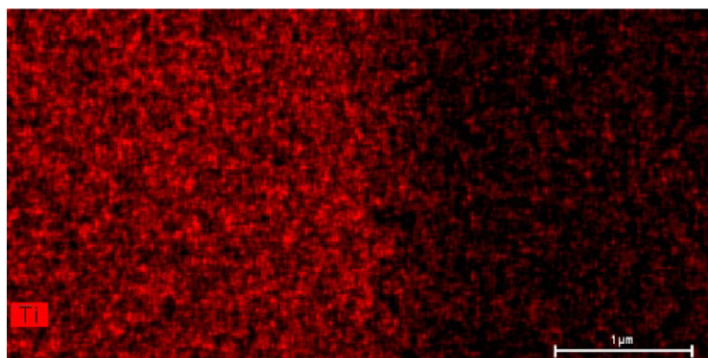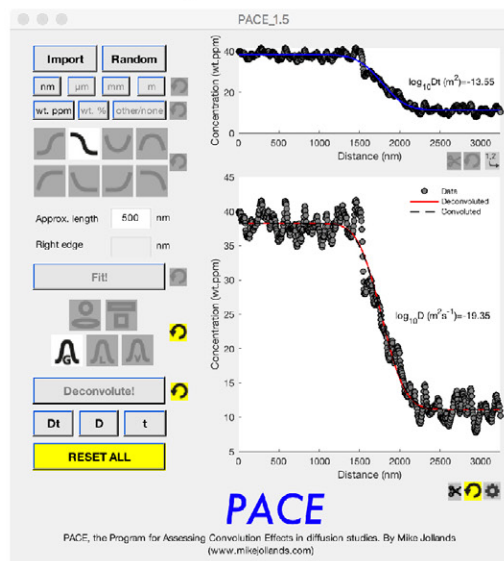

Supplementary Figure S9.

Additional examples of quantitative Ti distribution maps obtained by TEM.

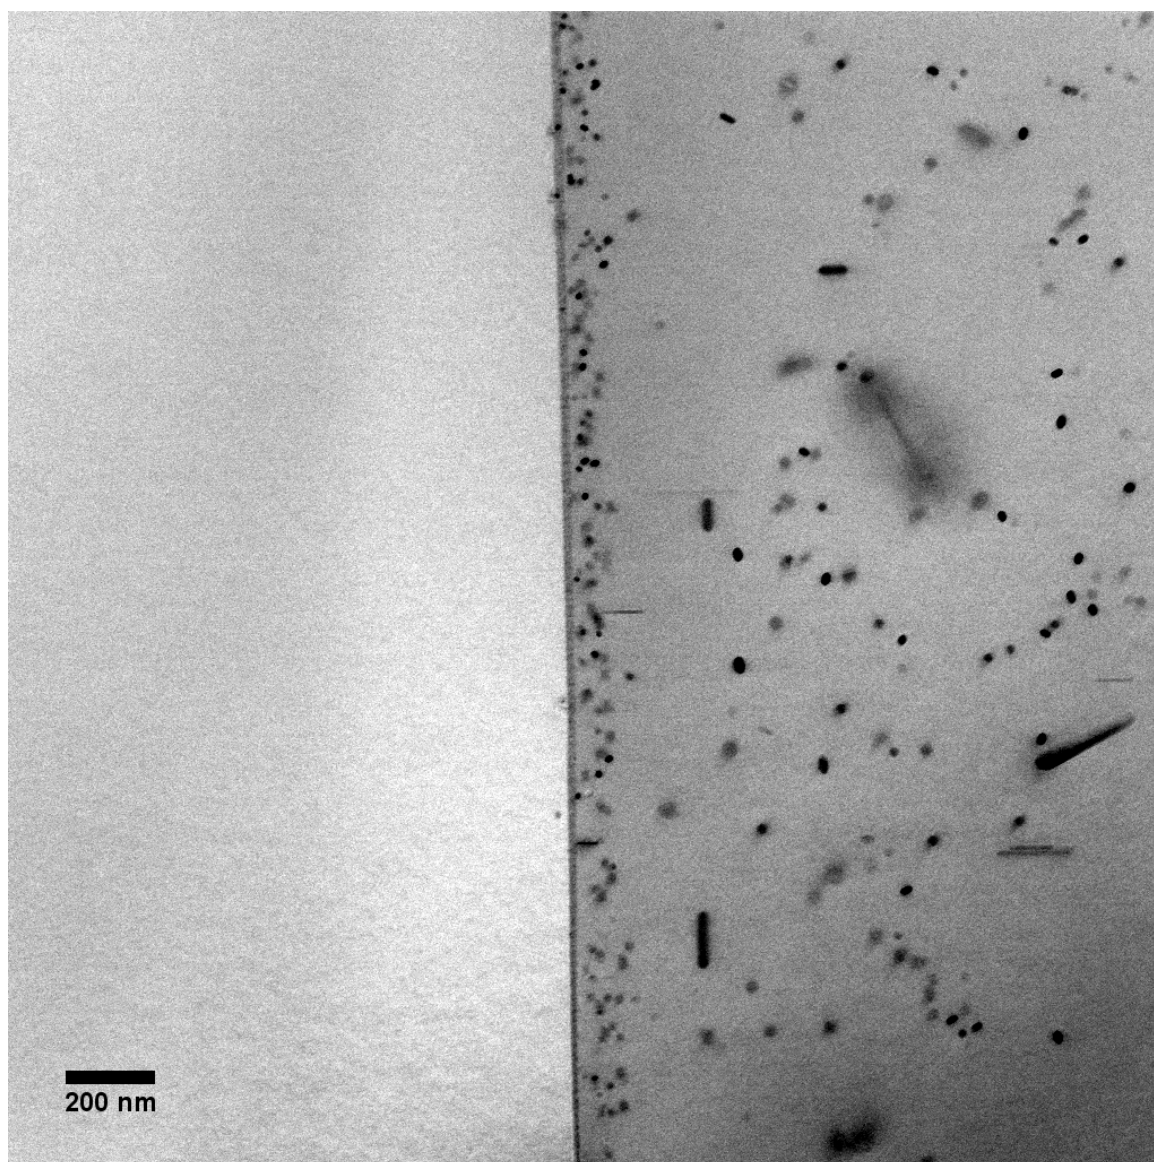

*Supplementary Figure S10.* Annular bright field image of the contact between Ti-poor quartz seed and Ti-rich quartz overgrowth in experiment TiDi17, which was performed with starting material SM02 at 1,000 °C, 1.5 GPa for 739 hrs. Due to the high pressure the  $\text{TiO}_2$  solubility in the quartz was exceeded, resulting in exsolution of small rutile crystals (=black features) from the Ti-rich quartz.



## Shaggy Peak sanidine phenocryst F2

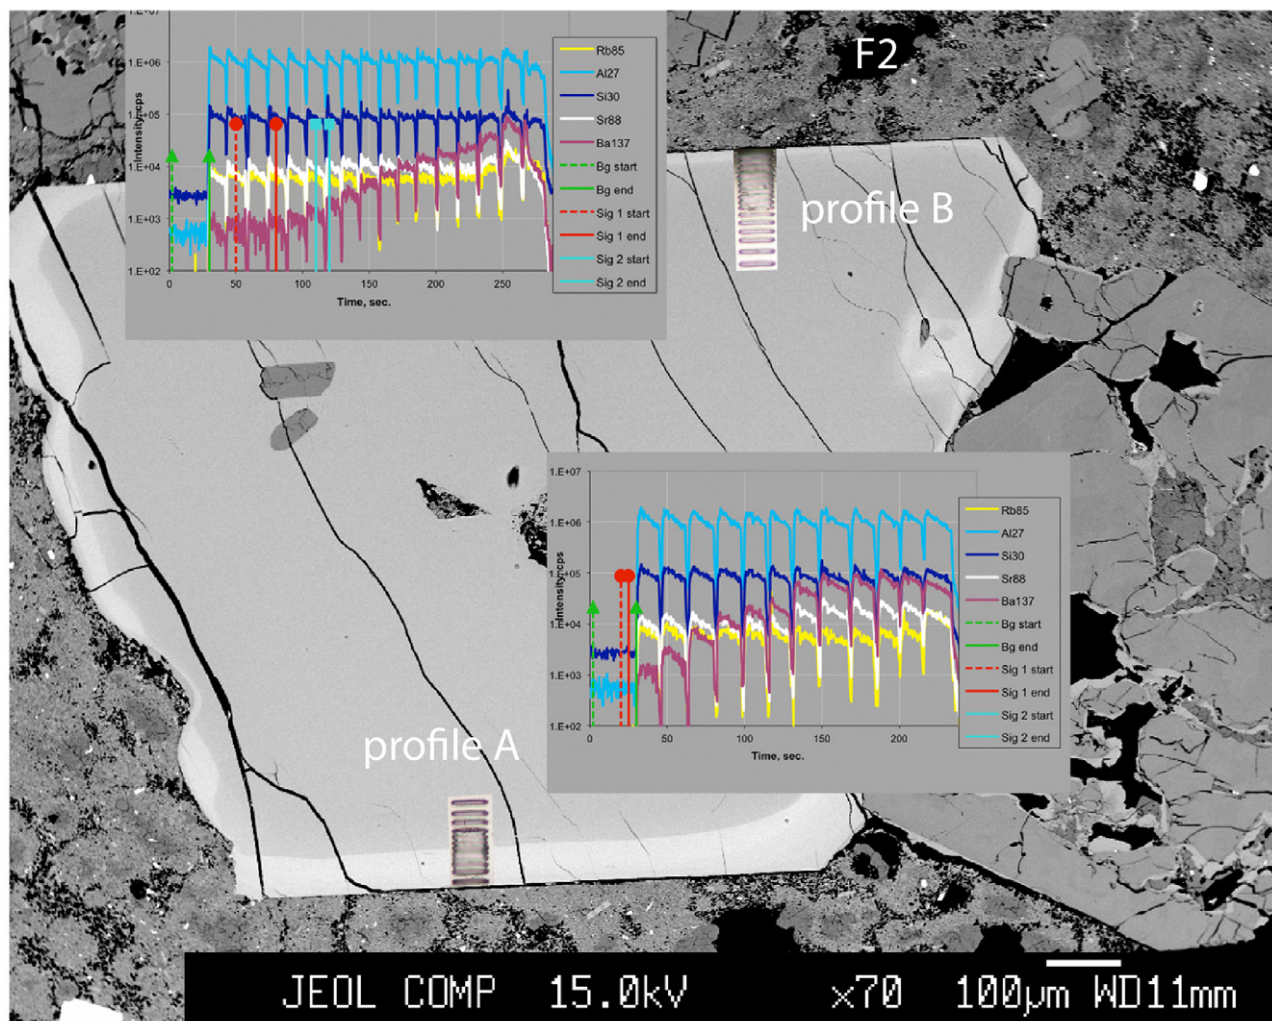

### Fit of Ba in profile A

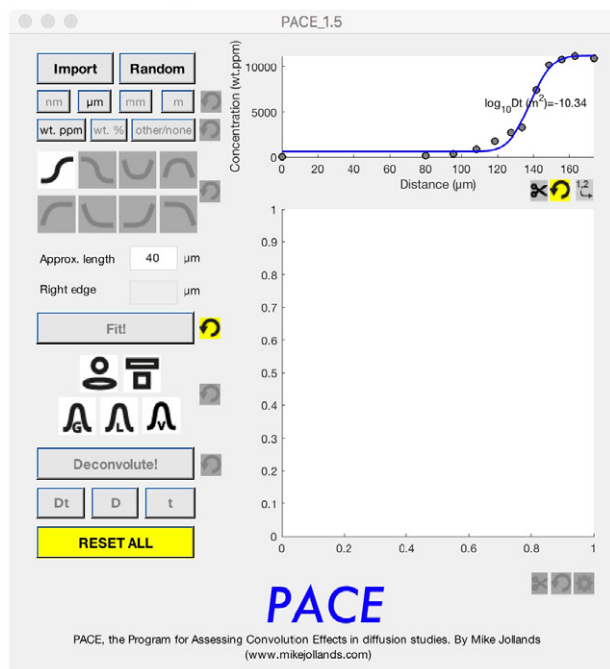

### Fit of Ba in profile B

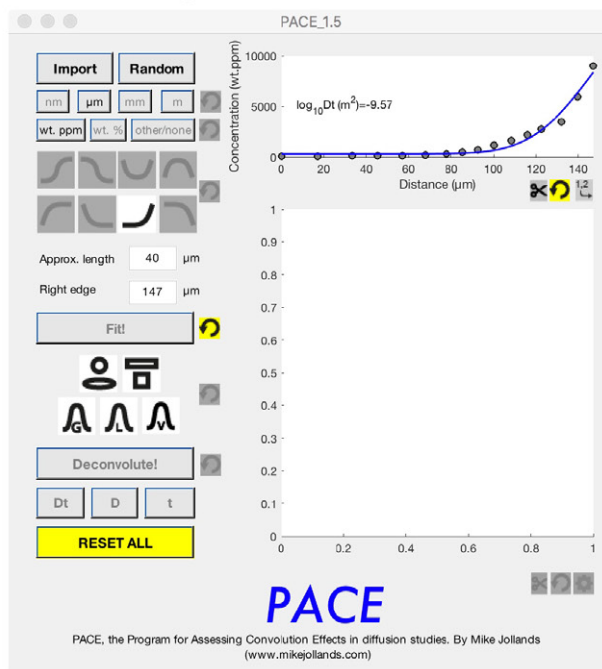

*Supplementary Figure S11.* BSE image of Shaggy Peak sanidine phenocryst F2, superimposed photomicrographs of LA-ICP-MS pits, LA-ICP-MS signals, and fits for Ba in the PACE program. Notice that the LA-ICP-MS signal is displayed on a logarithmic scale, which is why the Ba profile looks broader than on the BSE grayscale image.

## Shaggy Peak sanidine phenocryst F3

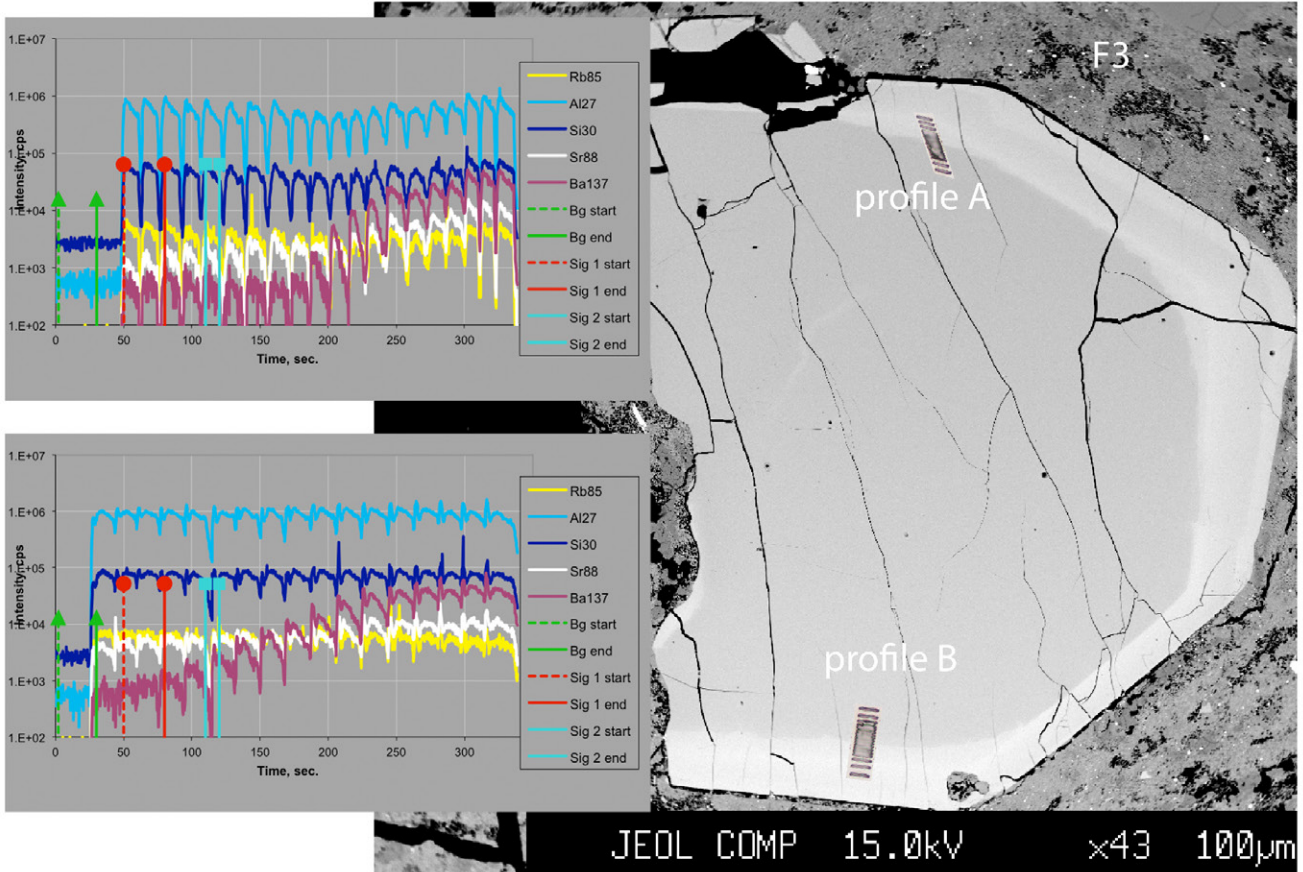

Fit of Ba in profile A

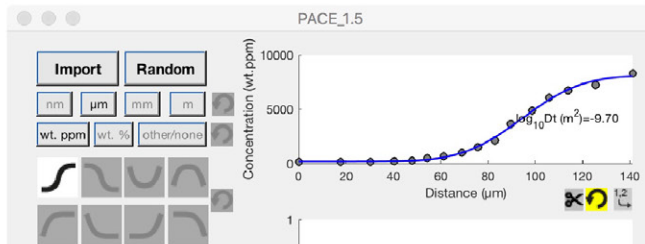

Fit of Sr in profile A

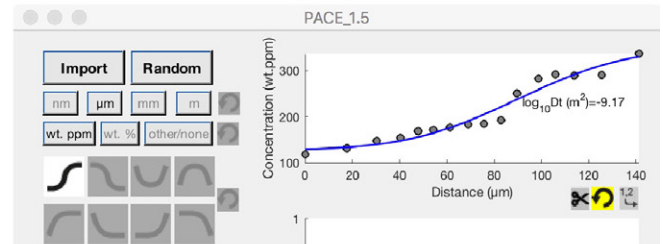

Fit of Ba in profile B

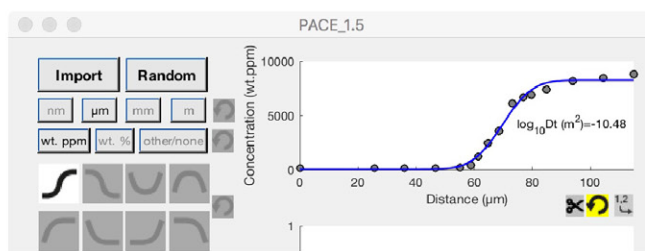

Fit of Sr in profile B

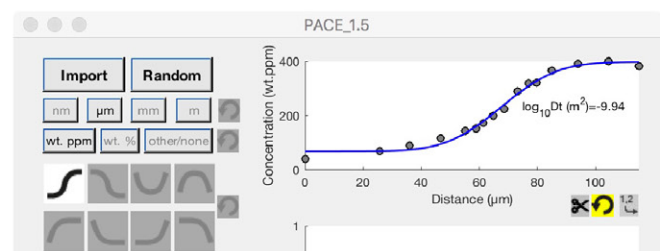

*Supplementary Figure S12.* BSE image of Shaggy Peak sanidine phenocryst F3, superimposed photomicrographs of LA-ICP-MS pits, LA-ICP-MS signals, and fits for Ba and Sr in the PACE program. Notice that the LA-ICP-MS signal is displayed on a logarithmic scale, which is why the Ba profile looks broader than on the BSE grayscale image.



## Shaggy Peak quartz phenocryst Q3

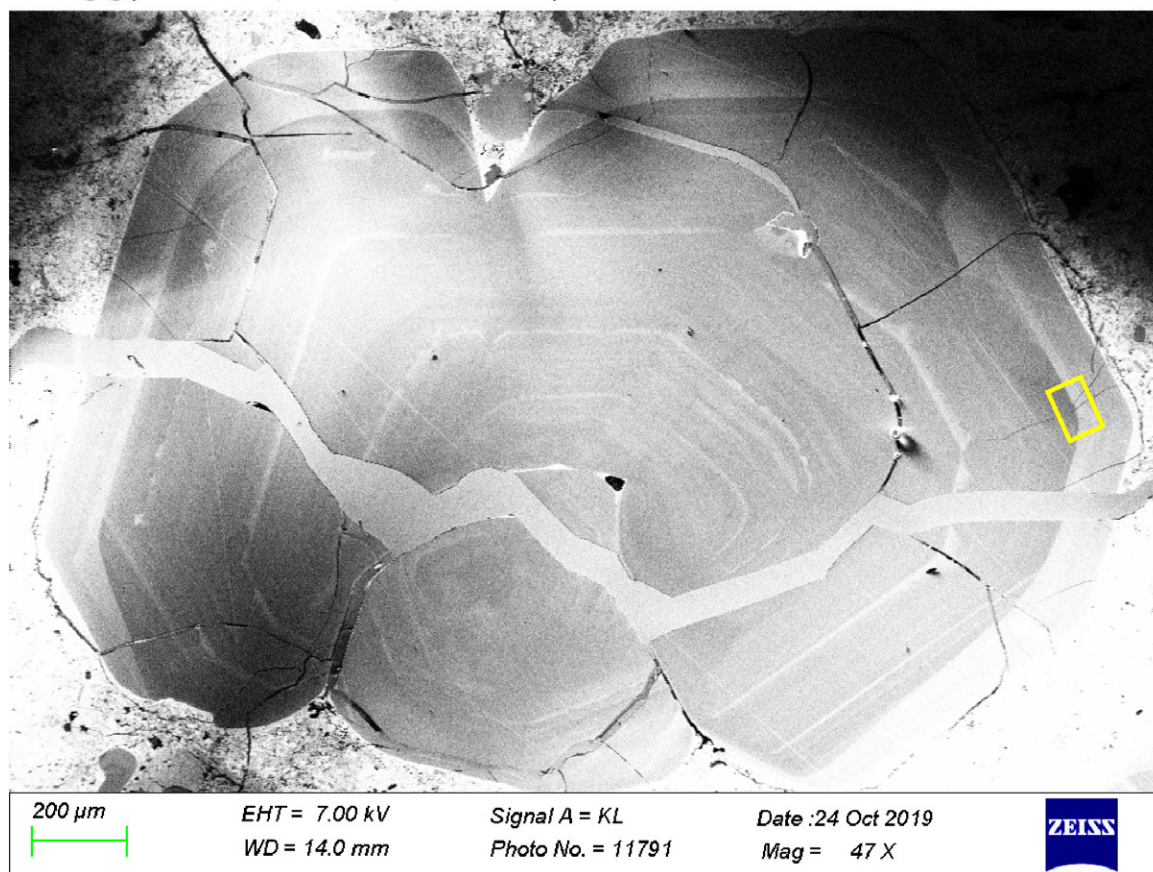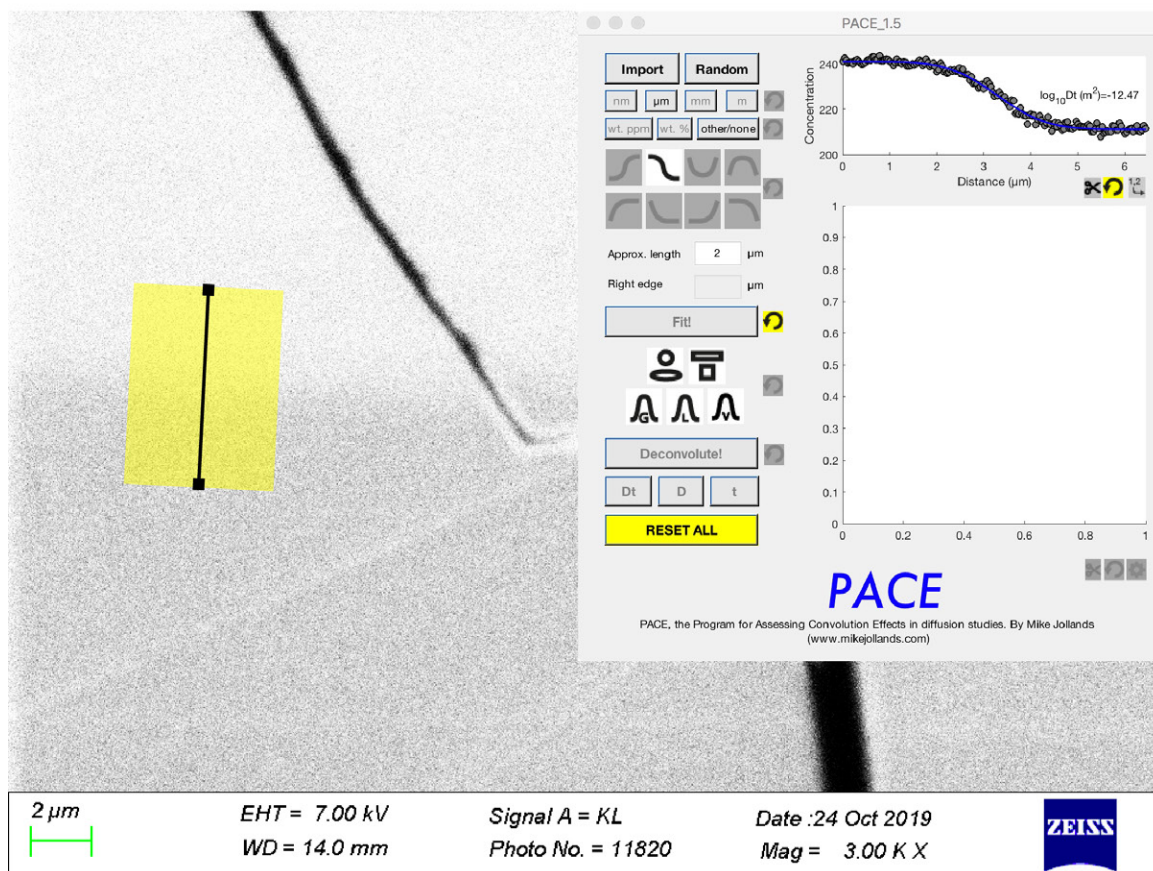

*Supplementary Figure S13.* CL image of Shaggy Peak quartz phenocryst Q3, the selected ImageJ profile (semitransparent, yellow area), and the corresponding PACE fit.



## Shaggy Peak quartz phenocryst Q5

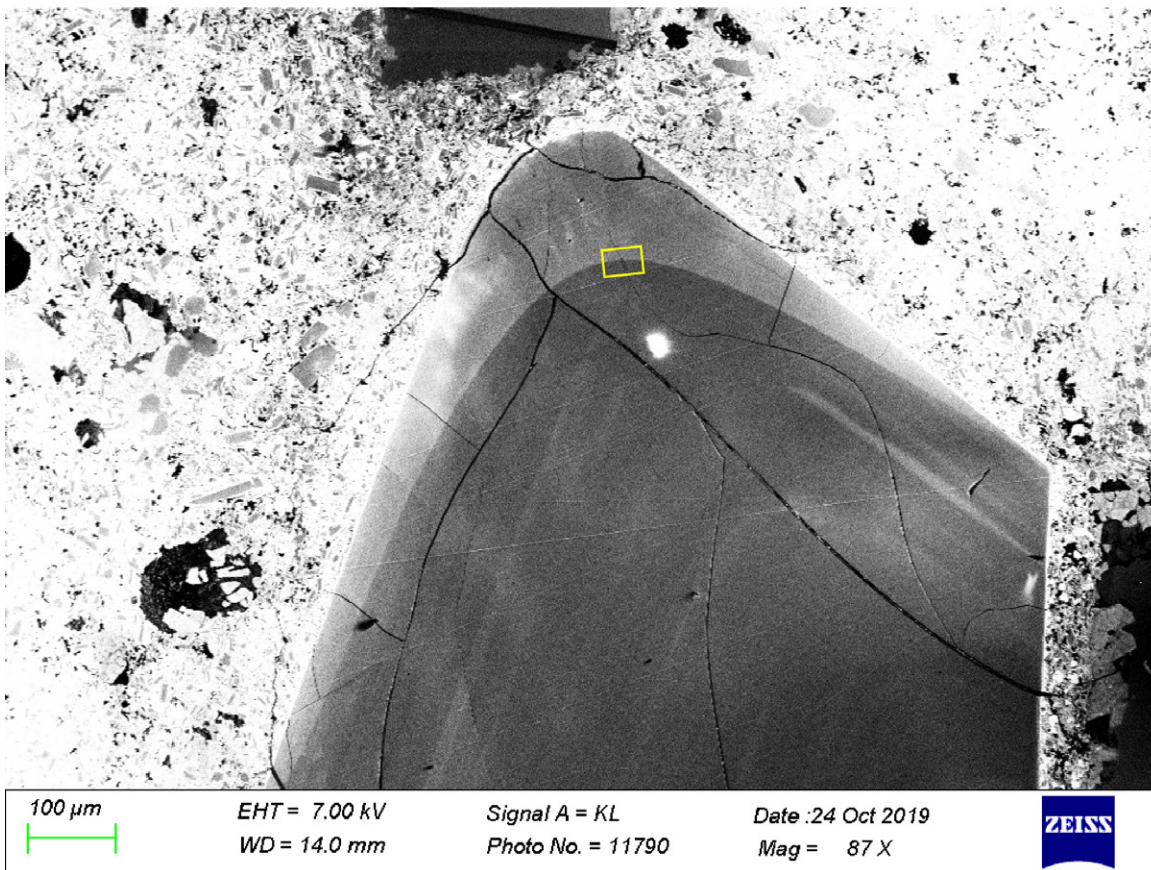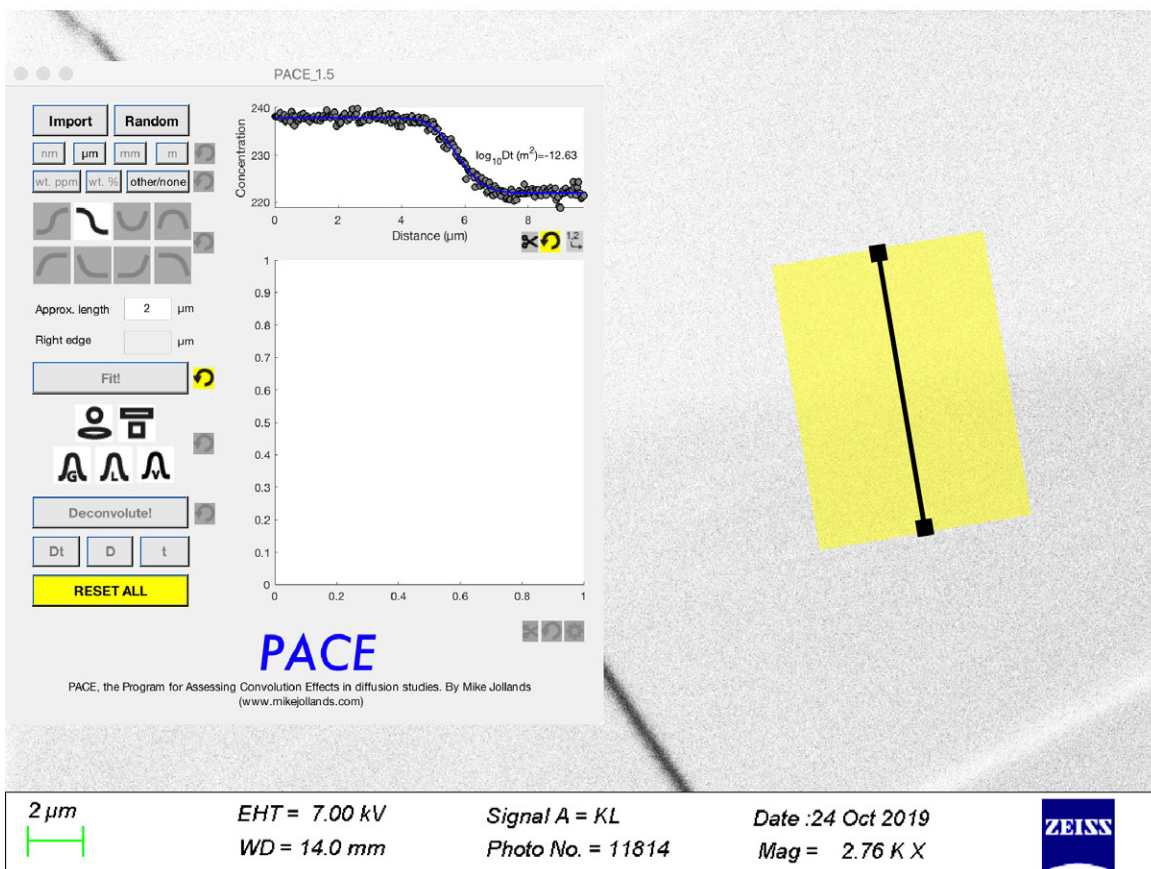

*Supplementary Figure S14.* CL image of Shaggy Peak quartz phenocryst Q5, the selected ImageJ profile (semitransparent, yellow area), and the corresponding PACE fit.

### 3. Supplementary Tables

**Supplementary Table S1** Overview of experiments and obtained results

| Run                            | Starting material <sup>1</sup>    | T (°C) | P (GPa) | Duration (hrs) | FWHM based on CL (μm)                 | FWHM based on TEM (μm)    |                                        | FWHM based on HIM-SIMS (μm) |                                             |      |
|--------------------------------|-----------------------------------|--------|---------|----------------|---------------------------------------|---------------------------|----------------------------------------|-----------------------------|---------------------------------------------|------|
| Synthesis of diffusion couples |                                   |        |         |                |                                       |                           |                                        |                             |                                             |      |
| SM01                           | qtz+rutile+glass+H <sub>2</sub> O | 1000   | 0.1     | 5              | 0.18                                  | N/A                       |                                        | N/A                         |                                             |      |
| SM02                           | qtz+rutile+glass+H <sub>2</sub> O | 1000   | 0.1     | 4              | 0.19                                  | 0.041                     |                                        | 0.069                       |                                             |      |
| SM03                           | qtz+rutile+H <sub>2</sub> O       | 700    | 0.2     | 166            | 0.42 (fast scan)                      | N/A                       |                                        | N/A                         |                                             |      |
| Run                            | Starting material                 | T (°C) | P (GPa) | Duration (hrs) | log D based on CL (m <sup>2</sup> /s) |                           | log D based on TEM (m <sup>2</sup> /s) |                             | log D based on HIM-SIMS (m <sup>2</sup> /s) |      |
| Annealing experiments          |                                   |        |         |                |                                       |                           |                                        |                             |                                             |      |
| TiDi01                         | natural qtz phenocryst            | 1600   | ca. 2.0 | 75             | -17.36 ± 0.02                         | convol. <sup>2</sup> 0.11 | convol. <sup>2</sup> N/A               |                             | convol. <sup>2</sup> N/A                    |      |
| TiDi08                         | SM01 (=high-Ti)                   | 1600   | ca. 2.0 | 74             | -18.24 ± 0.01                         | 0.01                      | N/A                                    |                             | N/A                                         |      |
| TiDi16                         | SM02 (=high-Ti)                   | 1600   | ca. 2.0 | 90             | -18.52 ± 0.01                         | 0.01                      | -19.09 ± 0.05                          | 0.02                        | N/A                                         |      |
| TiDi06                         | SM01 (=high-Ti)                   | 1600   | ca. 2.0 | 90             | -18.88 ± 0.01                         | 0.10                      | N/A                                    |                             | -18.8 ± 0.2                                 | 0.01 |
| TiDi46                         | SM03 (=low-Ti)                    | 1100   | 0       | 891            | <20.65 ± 0.13                         | N/A                       | N/A                                    |                             | N/A                                         |      |
| TiDi45                         | SM03 (=low-Ti)                    | 1200   | 0       | 473            | <20.26 ± 0.10                         | N/A                       | N/A                                    |                             | N/A                                         |      |
| TiDi47                         | SM03 (=low-Ti)                    | 1300   | 0       | 73             | <20.28 ± 0.15                         | N/A                       | N/A                                    |                             | N/A                                         |      |
| TiDi49                         | SM03 (=low-Ti)                    | 1300   | 0       | 141            | -20.26 ± 0.15                         | 0.83                      | N/A                                    |                             | N/A                                         |      |
| TiDi40                         | SM03 (=low-Ti)                    | 1100   | 2.0     | 811            | -19.39 ± 0.29                         | 0.06                      | N/A                                    |                             | N/A                                         |      |
| TiDi39                         | SM03 (=low-Ti)                    | 1200   | ca. 1.5 | 211            | -19.24 ± 0.18                         | 0.14                      | N/A                                    |                             | N/A                                         |      |
| TiDi44                         | SM03 (=low-Ti)                    | 1200   | ca. 1.3 | 424            | -19.84 ± 0.29                         | 0.23                      | N/A                                    |                             | N/A                                         |      |
| TiDi41                         | SM03 (=low-Ti)                    | 1400   | ca. 1.7 | 93             | -18.18 ± 0.06                         | 0.03                      | N/A                                    |                             | N/A                                         |      |
| TiDi42                         | SM03 (=low-Ti)                    | 1500   | ca. 1.7 | 67             | -18.55 ± 0.14                         | 0.09                      | N/A                                    |                             | N/A                                         |      |
| TiDi43                         | SM03 (=low-Ti)                    | 1600   | ca. 1.3 | 43             | -19.06 ± 0.29                         | 0.34                      | N/A                                    |                             | N/A                                         |      |
| TiDi22                         | SM02 (=high-Ti)                   | 1000   | 0       | 2033           | -22.14 ± 0.02                         | 0.84                      | -22.37 ± 0.07                          | 0.18                        | N/A                                         |      |
| TiDi23                         | SM02 (=high-Ti)                   | 1100   | 0       | 812            | -21.18 ± 0.03                         | 0.42                      | -20.74 ± 0.06                          | 0.01                        | N/A                                         |      |
| TiDi24                         | SM02 (=high-Ti)                   | 1200   | 0       | 383            | -21.22 ± 0.02                         | 0.75                      | -20.55 ± 0.10                          | 0.14                        | N/A                                         |      |
| TiDi27                         | SM02 (=high-Ti)                   | 1400   | ca. 0.3 | 166            | N/A                                   |                           | -19.35 ± 0.05                          | 0.02                        | N/A                                         |      |

FWHM – Full width at half maximum; N/A – not applicable

<sup>1</sup> qtz – quartz; glass – SiO<sub>2</sub> glass

<sup>2</sup> logD subtracted during signal deconvolution

**Supplementary Table S2** Diffusion data of Shaggy Peak Rhyolite

| Mineral  | Phenocryst | Profile | log Dt Ti (m <sup>2</sup> ) | log Dt Ba (m <sup>2</sup> ) | log Dt Sr (m <sup>2</sup> ) | Quality of fit <sup>1</sup> | Remarks <sup>2</sup>            |
|----------|------------|---------|-----------------------------|-----------------------------|-----------------------------|-----------------------------|---------------------------------|
| quartz   | Q1         |         | -12.51                      | N/A                         |                             | ***                         |                                 |
| quartz   | Q3         |         | -12.47                      | N/A                         |                             | ***                         |                                 |
| quartz   | Q5         |         | -12.63                      | N/A                         |                             | ***                         |                                 |
| quartz   | Q7         |         | -12.50                      | N/A                         |                             | ***                         |                                 |
| sanidine | F2         | A       | N/A                         | -10.34                      | not fittable                | ** (Ba)                     |                                 |
| sanidine | F2         | B       | N/A                         | -9.57                       | not fittable                | * (Ba)                      | only half of the profile fitted |
| sanidine | F3         | A       | N/A                         | -9.70                       | ca. -9.17                   | ** (Ba); * (Sr)             | no plateaus for Sr              |
| sanidine | F3         | B       | N/A                         | ≤ -10.48                    | -9.94                       | ** (Ba); ** (Sr)            | small growth effect             |
| sanidine | F6         |         | N/A                         | -9.74                       | -8.57                       | * (Ba); *** (Sr)            |                                 |
| sanidine | F9         | A       | N/A                         | -10.99                      | ca. -8.97                   | *** (Ba); * (Sr)            | no plateaus for Sr              |
| sanidine | F9         | B       | N/A                         | -10.64                      | ca. -8.93                   | *** (Ba); * (Sr)            | no plateaus for Sr              |

N/A – not applicable

<sup>1</sup> three stars means very good fit; one star means only partial fit

<sup>2</sup> growth effect means that part of the measured profile probably reflects an original growth zonation rather than a diffusion profile.

**Supplementary Table S3** LA-ICP-MS analyses of melt inclusions and host quartz of the Shaggy Peak Rhyolite

| Analysis  | Sample                        | SiO <sub>2</sub><br>wt% | TiO <sub>2</sub><br>wt% | Al <sub>2</sub> O <sub>3</sub><br>wt% | FeO <sub>tot</sub><br>wt% | MnO<br>wt% | MgO<br>wt% | CaO<br>wt% | Na <sub>2</sub> O<br>wt% | K <sub>2</sub> O<br>wt% | total<br>wt% |
|-----------|-------------------------------|-------------------------|-------------------------|---------------------------------------|---------------------------|------------|------------|------------|--------------------------|-------------------------|--------------|
| 20Oc26b09 | Shag Q1 MI1 core 25µm         | 78.97                   | 0.05                    | 12.28                                 | 0.35                      | 0.11       | 0.03       | 0.45       | 3.05                     | 4.72                    | 100.00       |
| 20Oc26b11 | Shag Q1 MI2 rim 17µm          | 78.46                   | 0.09                    | 12.50                                 | 0.50                      | 0.05       | 0.23       | 0.75       | 2.92                     | 4.50                    | 100.00       |
| 20Oc26b13 | Shag Q1 MI3 rim 17µm          | 79.11                   | 0.08                    | 12.44                                 | 0.49                      | 0.05       | 0.13       | 0.75       | 2.72                     | 4.23                    | 100.00       |
| 20Oc26b17 | Shag Q3 MI1 core 30µm         | 78.35                   | 0.05                    | 12.25                                 | 0.37                      | 0.10       | 0.03       | 0.45       | 3.71                     | 4.70                    | 100.00       |
| 20Oc26c05 | Shag Q3 MI2 rim 40µm          | 77.79                   | 0.07                    | 12.79                                 | 0.56                      | 0.06       | 0.06       | 0.83       | 3.28                     | 4.56                    | 100.00       |
| 20Oc26c09 | Shag Q10 MI1 core 35µm        | 78.76                   | 0.05                    | 12.40                                 | 0.37                      | 0.11       | 0.03       | 0.44       | 3.38                     | 4.46                    | 100.00       |
| 20Oc26c10 | Shag Q10 exposed MI core 40µm | 77.93                   | 0.05                    | 12.51                                 | 0.39                      | 0.11       | 0.04       | 0.31       | 3.90                     | 4.77                    | 100.00       |
| 20Oc26c11 | Shag Q6 exposed MI core 40µm  | 77.92                   | 0.05                    | 12.31                                 | 0.39                      | 0.10       | 0.04       | 0.44       | 3.95                     | 4.80                    | 100.00       |

**Supplementary Table S3** (contd.)

| Analysis  | Sample                        | B<br>µg/g | Rb<br>µg/g | Sr<br>µg/g | Y<br>µg/g | Zr<br>µg/g | Nb<br>µg/g | Mo<br>µg/g | Sn<br>µg/g | Cs<br>µg/g | Ba<br>µg/g |
|-----------|-------------------------------|-----------|------------|------------|-----------|------------|------------|------------|------------|------------|------------|
| 20Oc26b09 | Shag Q1 MI1 core 25µm         | 85        | 313        | 5          | 39        | 42         | 41         | 2          | (8)        | 16         | 8          |
| 20Oc26b11 | Shag Q1 MI2 rim 17µm          | (31)      | 160        | 84         | 20        | 72         | 15         | 2          | (18)       | 5          | 527        |
| 20Oc26b13 | Shag Q1 MI3 rim 17µm          | (40)      | 149        | 80         | 16        | 62         | 18         | (2)        | (23)       | 4          | 460        |
| 20Oc26b17 | Shag Q3 MI1 core 30µm         | 83        | 292        | 14         | 40        | 43         | 42         | 1          | (11)       | 16         | 34         |
| 20Oc26c05 | Shag Q3 MI2 rim 40µm          | 38        | 179        | 90         | 20        | 68         | 20         | 2          | (3)        | 6          | 606        |
| 20Oc26c09 | Shag Q10 MI1 core 35µm        | 65        | 309        | 3          | 38        | 45         | 41         | 1          | (3)        | 15         | 4          |
| 20Oc26c10 | Shag Q10 exposed MI core 40µm | 69        | 335        | 3          | 35        | 45         | 41         | 2          | (4)        | 18         | 7          |
| 20Oc26c11 | Shag Q6 exposed MI core 40µm  | 88        | 327        | 2          | 33        | 47         | 41         | 1          | 3          | 17         | 1          |

**Supplementary Table S3** (contd.)

| Analysis  | Sample                        | Ce<br>µg/g | W<br>µg/g | Pb<br>µg/g | Bi<br>µg/g | U<br>µg/g | Th<br>µg/g | Ti qtz<br>µg/g | FM   | T zirc <sup>1</sup><br>°C | aTiO <sub>2</sub> <sup>2</sup> | P TitaniQ <sup>3</sup><br>MPa |
|-----------|-------------------------------|------------|-----------|------------|------------|-----------|------------|----------------|------|---------------------------|--------------------------------|-------------------------------|
| 20Oc26b09 | Shag Q1 MI1 core 25µm         | 26         | 4         | 50         | 1          | 21        | 17         | 32             | 1.26 | 699                       | 0.75                           | 435                           |
| 20Oc26b11 | Shag Q1 MI2 rim 17µm          | 41         | (3)       | 43         | (1)        | 6         | 21         | 52             | 1.34 | 739                       | 0.75                           | 384                           |
| 20Oc26b13 | Shag Q1 MI3 rim 17µm          | 40         | (4)       | 34         | (1)        | 6         | 19         | 52             | 1.23 | 733                       | 0.74                           | 353                           |
| 20Oc26b17 | Shag Q3 MI1 core 30µm         | 26         | 4         | 43         | 1          | 19        | 16         | 35             | 1.40 | 692                       | 0.66                           | 321                           |
| 20Oc26c05 | Shag Q3 MI2 rim 40µm          | 41         | 3         | 45         | 0          | 8         | 22         | 53             | 1.37 | 730                       | 0.71                           | 322                           |
| 20Oc26c09 | Shag Q10 MI1 core 35µm        | 28         | 4         | 48         | 1          | 18        | 19         | 35             | 1.28 | 703                       | 0.72                           | 394                           |
| 20Oc26c10 | Shag Q10 exposed MI core 40µm | 26         | 4         | 52         | 1          | 18        | 16         | 35             | 1.40 | 695                       | 0.68                           | 344                           |
| 20Oc26c11 | Shag Q6 exposed MI core 40µm  | 28         | 4         | 58         | 1          | 17        | 21         | n.a.           | 1.47 | 694                       | 0.69                           | N/A                           |

n.a. – not analyzed; N/A – not applicable; red numbers in parentheses denote detection limits

<sup>1</sup> zircon saturation temperature according to Watson and Harrison (1983) assuming 68.2 wt% ZrO<sub>2</sub> in zircon

<sup>2</sup> activity of TiO<sub>2</sub> in the silicate melt according to the TiO<sub>2</sub> solubility model of Kularatne and Audétat (2014)

<sup>3</sup> TitaniQ pressure according to the model of Huang and Audétat (2012)

#### 4. Supplementary References

Audétat, A., 2013, Origin of Ti-rich rims in quartz phenocrysts from the Upper Bandelier Tuff and the Tunnel Spring Tuff, southwestern USA: *Chemical Geology*, v. 360-361, p. 99-104.

Dowsett, D., and Wirtz, T., 2017, Co-registered in situ secondary electron and mass spectral imaging on the Helium Ion Microscope demonstrated using lithium titanate and magnesium oxide nanoparticles: *Analytical Chemistry*, v. 89, p. 8957–8965.

Ginibre, C., Wörner, G., and Kronz, A., 2004, Structure and dynamics of the Laacher See magma chamber (Eifel, Germany) from major and trace element zoning in sanidine: a cathodoluminescence and electron microprobe study: *Journal of Petrology*, v. 45, p. 2197-2223.

Kim, S., Trofimov, A., Khanom, F., Stern, L., Lamberti, W., Colby, R., Abmayr, D., Belianinov, A., and Ovchinnikova, O.S., 2019, High-resolution multimodal

- chemical imaging platform for organics and inorganics: *Analytical Chemistry*, v. 91, p. 12142–12148.
- Kularatne, K., and Audétat, A., 2014, Rutile solubility in hydrous rhyolite melts at 750-900 °C and 2 kbar, with application to titanium-in-quartz (TitaniQ) thermobarometry: *Geochimica et Cosmochimica Acta*, v. 125, p. 196-209.
- Thomas, J. B., Watson, E. B., Spear, F. S., Shemella, P. T., Nayak, S. K., and Lanzirotti, A., 2010, TitaniQ under pressure: the effect of pressure and temperature on the solubility of Ti in quartz: *Contributions to Mineralogy and Petrology*, v. 160, p. 743-759.
- Usiobo, O.J., Kanda, H., Gratia, P., Zimmermann, I., Wirtz, T., Nazeeruddin, M.K., and Audinot, J.-N., 2020, Nanoscale mass-spectrometry imaging of grain boundaries in perovskite semiconductors: *The Journal of Physical Chemistry C*, doi:10.1021/acs.jpcc.0c07464.
- Watson, B. E., and Harrison, M. T., 1983, Zircon saturation revisited: temperature and composition effects in a variety of crystal magma types: *Earth and Planetary Science Letters*, v. 64, p. 295-304.
